# Supplementary material for: Overview of the SAMPL5 host–guest challenge: Are we doing better?
Source: Springer Nature journal article supplement (doi:10.1007/s10822-016-9974-4), 2016-09-22
Supplement: 10822_2016_9974_MOESM3_ESM.pdf [file 10822_2016_9974_MOESM3_ESM.pdf]

# Supplementary Material

## **Overview of the SAMPL5 Host-Guest Challenge: Are We Doing Better?**

Jian Yin<sup>†</sup>, Niel M. Henriksen<sup>†</sup>, David R. Slochower<sup>†</sup>, Michael R. Shirts<sup>‡</sup>, Michael W. Chiu<sup>¶</sup>, David L. Mobley<sup>ψ</sup> and Michael K. Gilson<sup>†\*</sup>

<sup>†</sup>Skaggs School of Pharmacy and Pharmaceutical Sciences, University of California San Diego, La Jolla, CA 92093, USA

<sup>‡</sup>Department of Chemical and Biological Engineering, University of Colorado Boulder, Boulder, CO 80309, USA

<sup>¶</sup>Qualcomm Institute, University of California, San Diego, La Jolla, CA 92093, USA

<sup>ψ</sup>Departments of Pharmaceutical Sciences and Chemistry, University of California Irvine, Irvine, CA 92697, USA

**Table S1.** Binding constants of OAH and OAMe systems, measured by NMR and ITC.

| Guest     | OAH (octa acid, OA)                  |                         | OAMe (TEMOA)            |                         |
|-----------|--------------------------------------|-------------------------|-------------------------|-------------------------|
|           | $K_a$ ( $M^{-1}$ ), ITC              | $K_a$ ( $M^{-1}$ ), NMR | $K_a$ ( $M^{-1}$ ), ITC | $K_a$ ( $M^{-1}$ ), NMR |
| <b>G1</b> | 9040                                 | 5055                    | $1.02 \times 10^4$      | 7475                    |
|           | 9000                                 | 4949                    | $1.01 \times 10^4$      | 6407                    |
|           | <b>9080</b>                          |                         |                         |                         |
| <b>G2</b> | 2900                                 | 1279                    | 7240                    | 4691                    |
|           | 2870                                 | 1335                    | 6930                    | 5221                    |
|           | <b>2900</b>                          |                         |                         |                         |
| <b>G3</b> | 1980                                 | 5099                    | $1.75 \times 10^4$      | 18360                   |
|           | 1940                                 | 5229                    | $1.45 \times 10^4$      | 27761                   |
|           | <b>1960</b>                          |                         |                         |                         |
| <b>G4</b> | $7.47 \times 10^6$                   |                         |                         | 58                      |
|           | $7.41 \times 10^6$                   | -                       | -                       | 54                      |
|           | <b><math>7.41 \times 10^6</math></b> |                         |                         |                         |
| <b>G5</b> | 528                                  | 2000                    |                         | 706                     |
|           | 539                                  | 1993                    | -                       | 753                     |
| <b>G6</b> | 8200                                 | 3809                    | 1980                    | 1525                    |
|           | 8100                                 | 4061                    | 2120                    | 2110                    |
|           | <b>8120</b>                          |                         |                         |                         |

At the time of this analysis, Dr. Bruce Gibb had kindly provided us with duplicate measurements for each system, each based on preparation of fresh solutions of the host and guest. At some point the Gibb lab added a third ITC replicate for the OAH subset, as stated in the experimental paper (ref 37 in the main text), with results similar to those reported here. The third set of results, listed in bold, is not included in our analysis. ITC experimental conditions: 298 K, 50 mM sodium phosphate buffer, pH = 11.5; NMR experimental conditions: 298 K (278 K for OAMe-G4), 10 mM sodium phosphate buffer, pH = 11.3.

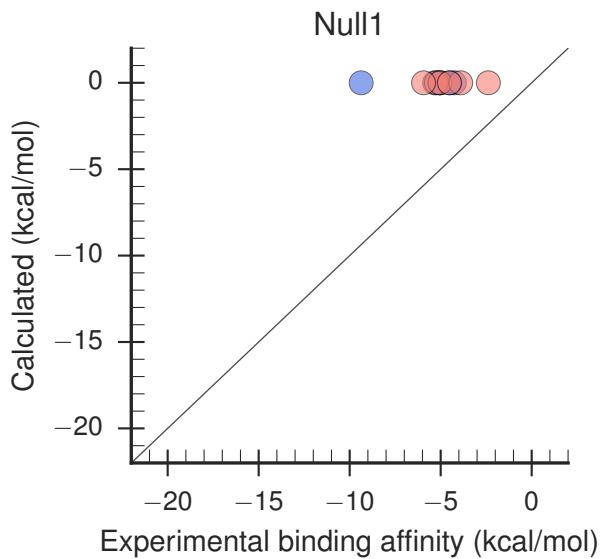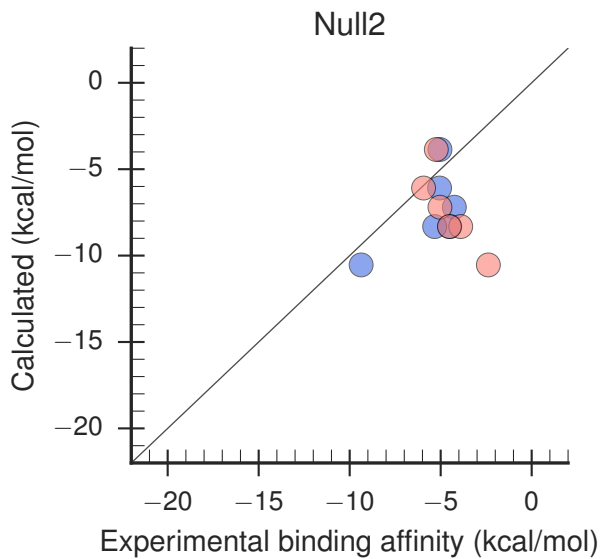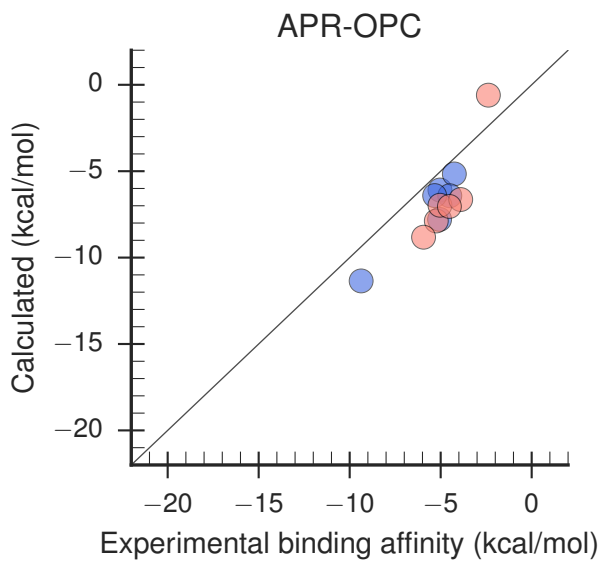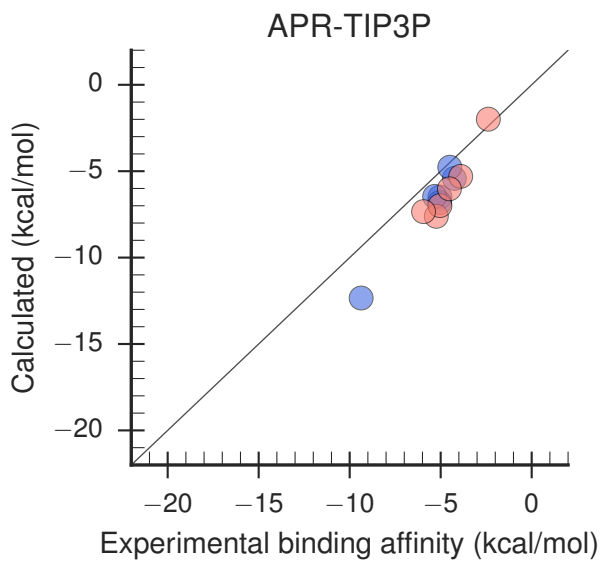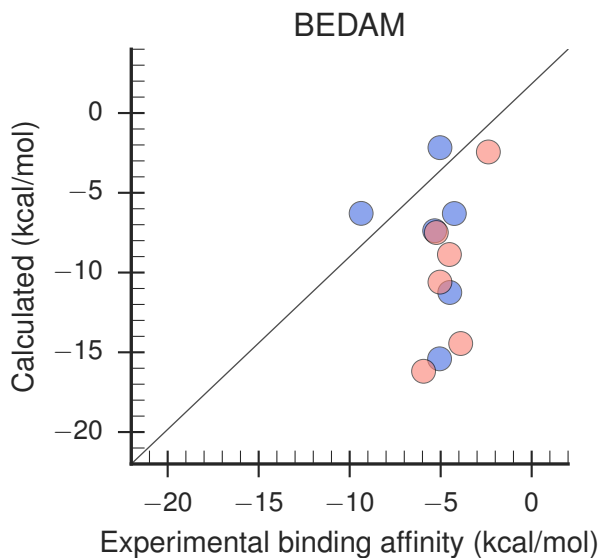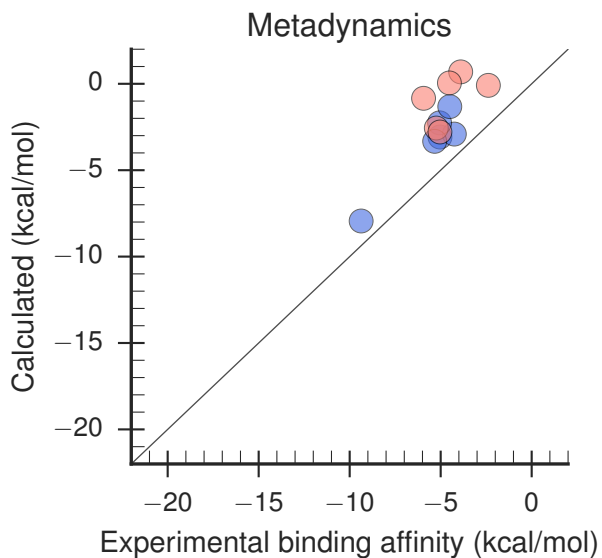

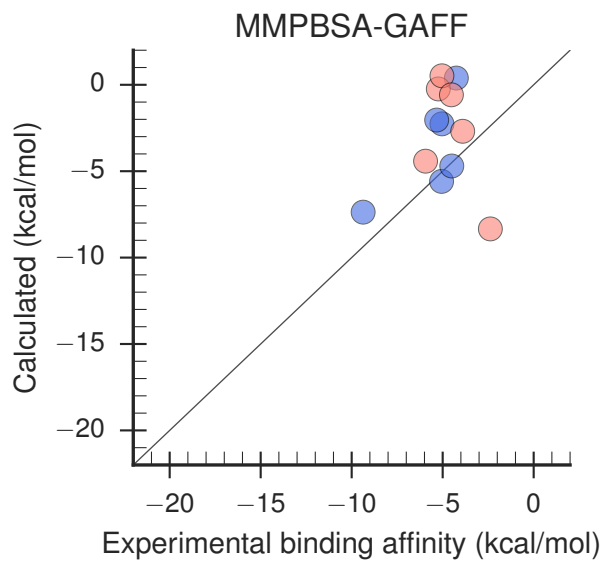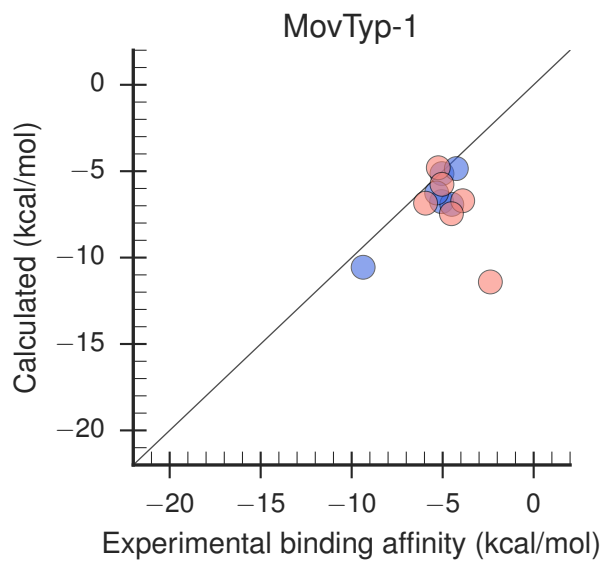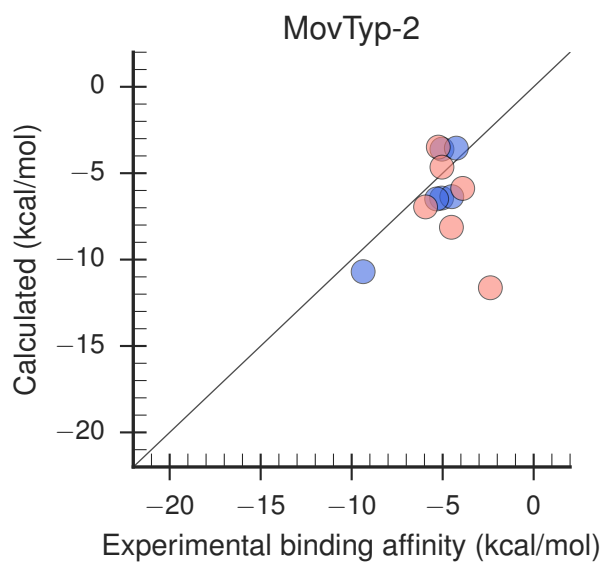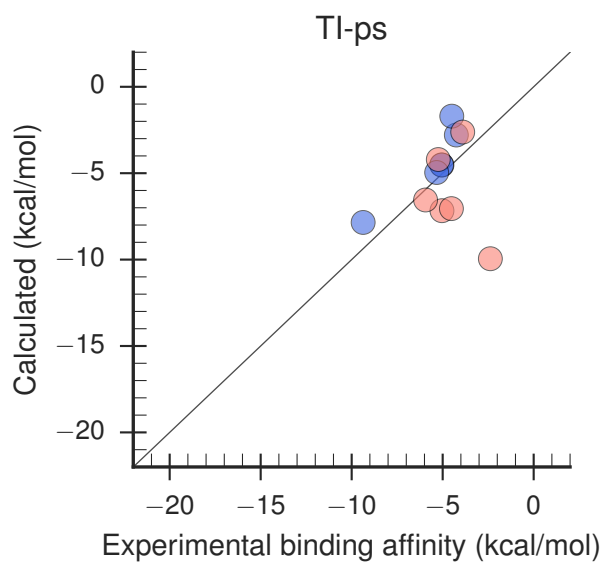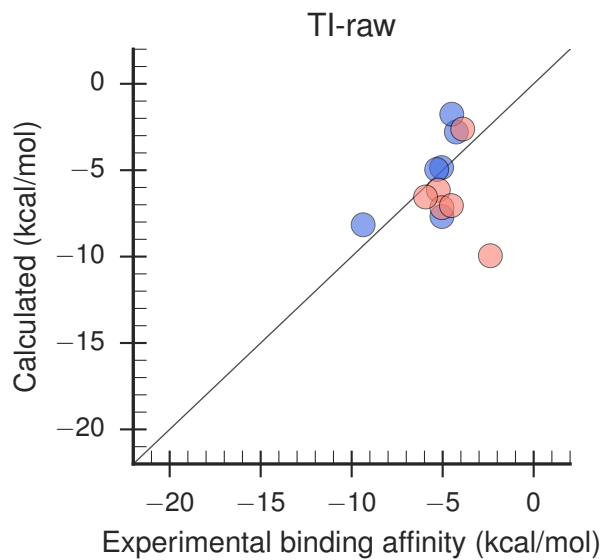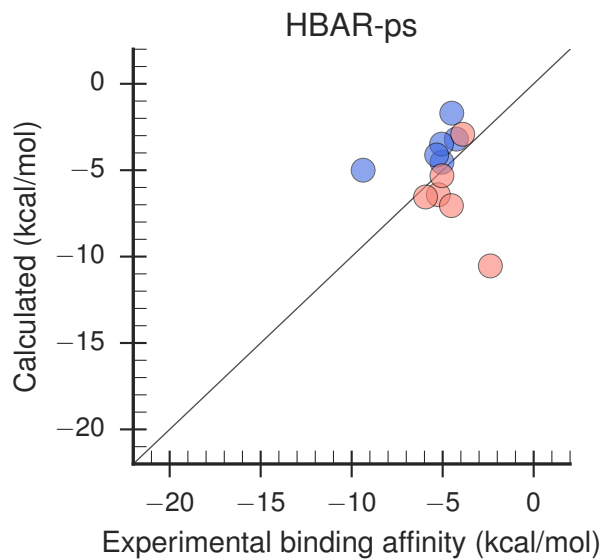

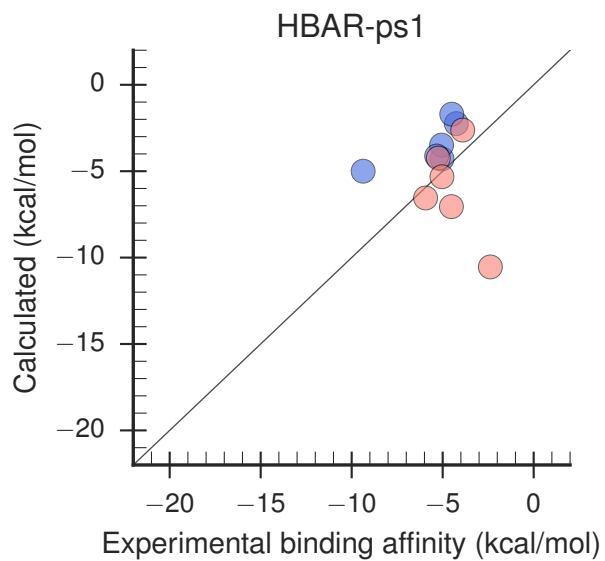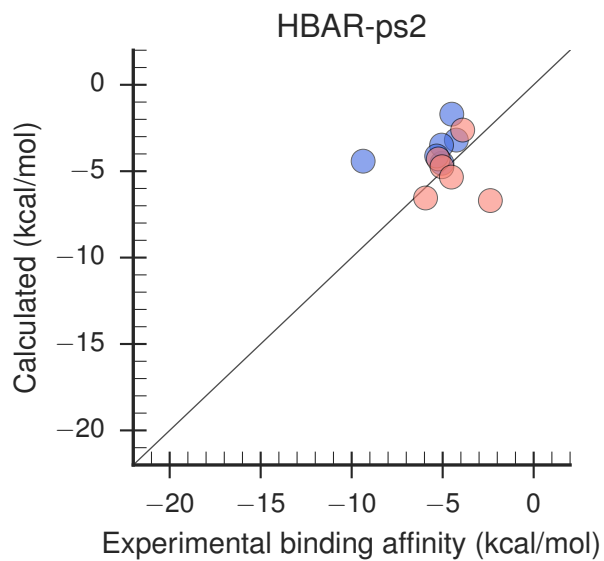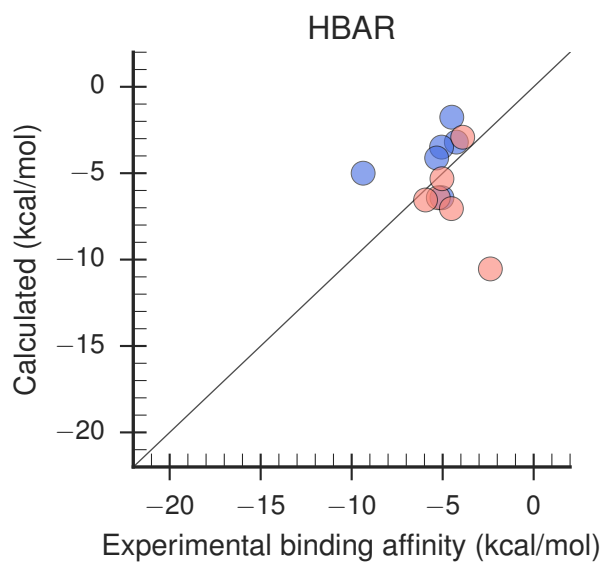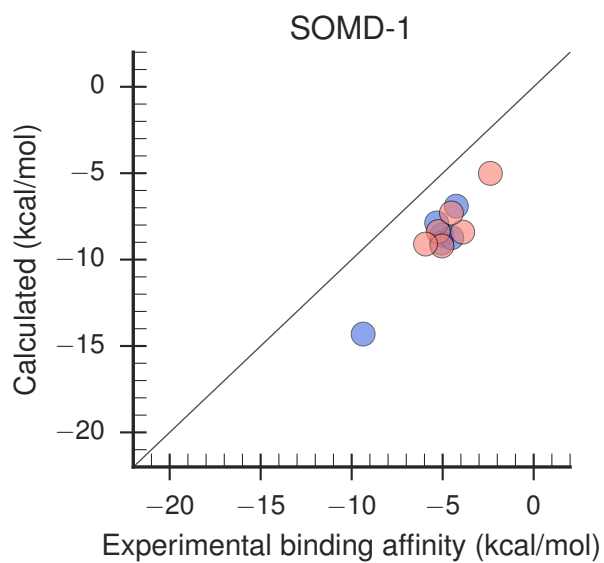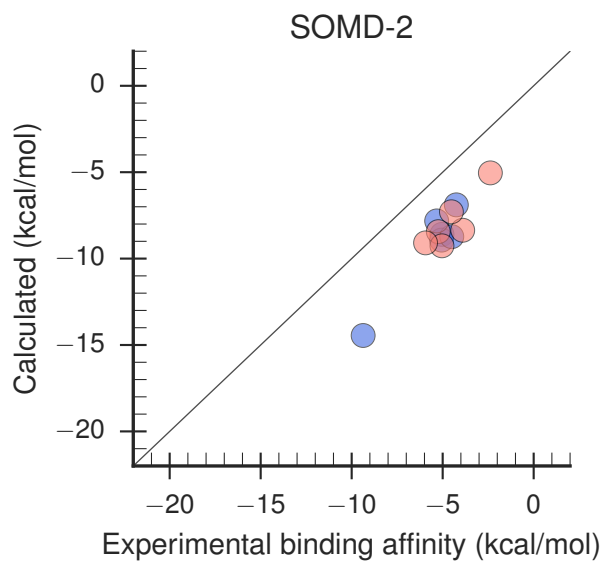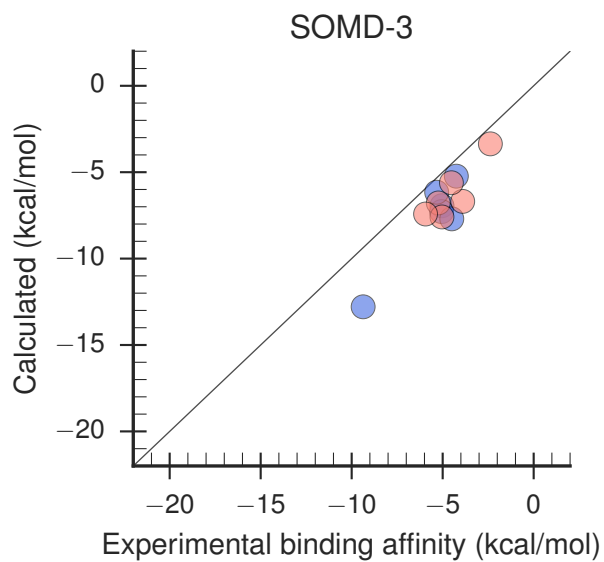

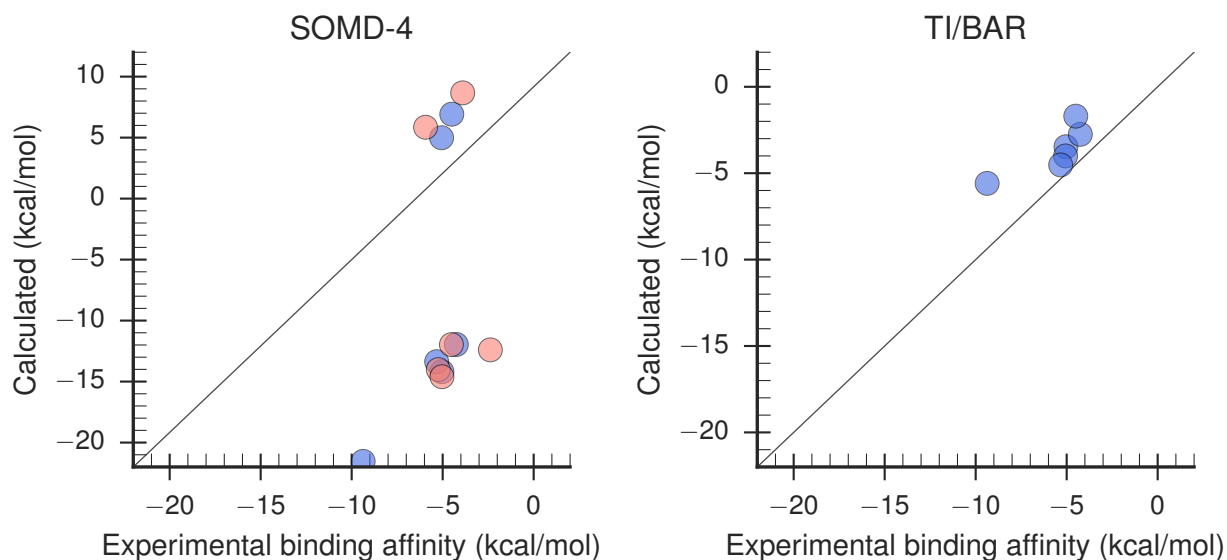

**Fig S1.** Combined OAH/OAMe predictions, one set of predictions for the OAH subset and two null models. Original data from the submission files were compared to the selected NMR/ITC binding affinities. A constant value of 0.0 was assigned to all guests in the Null1 model, and the estimates in Null2 were generated based on the linear regression between the number of heavy atoms and experimental binding affinities of host OA in SAMPL4 challenge (see main text). Purple dots: OAH; red dots: OAMe; solid black: line of identity.

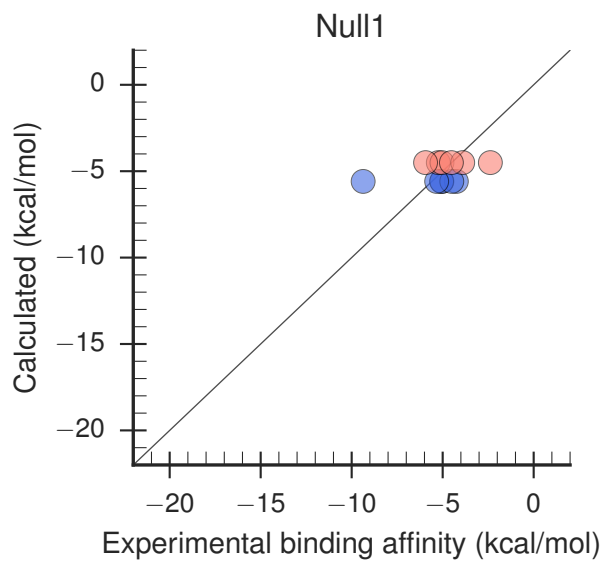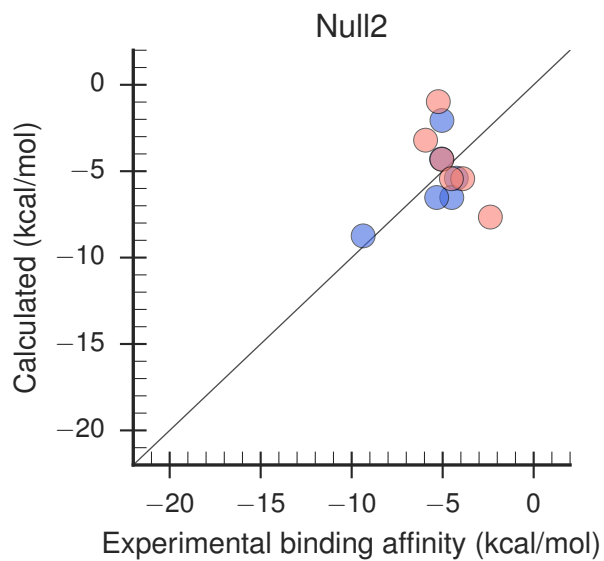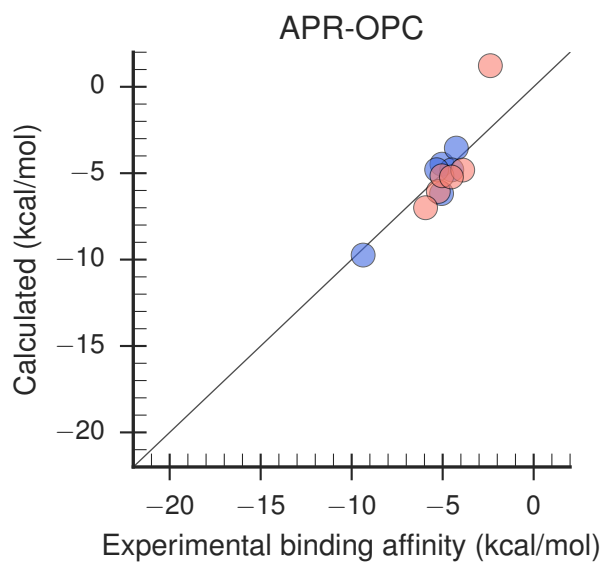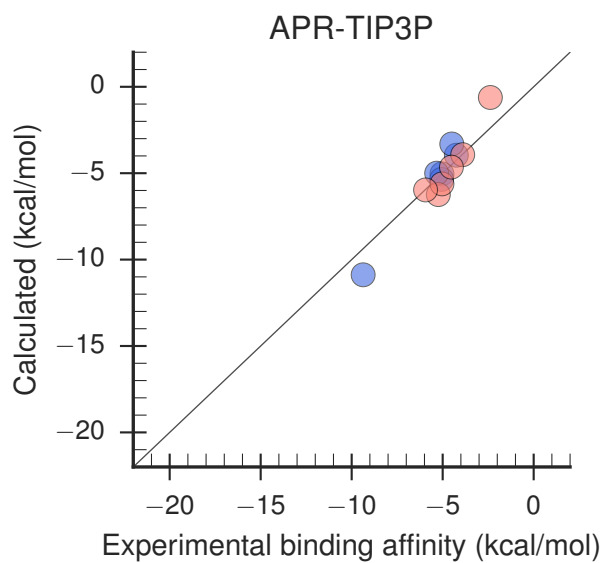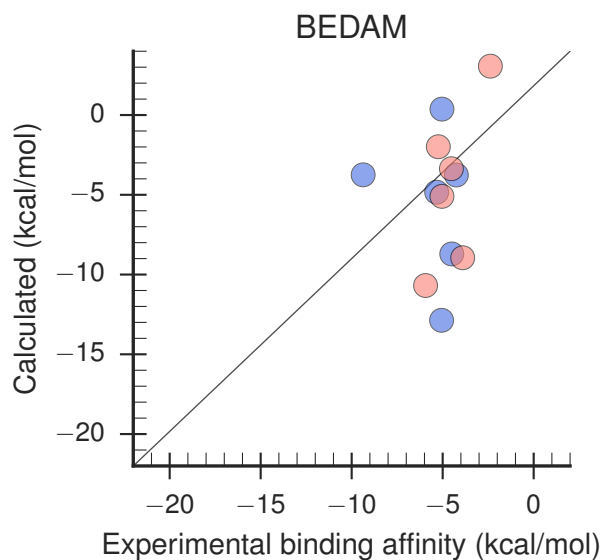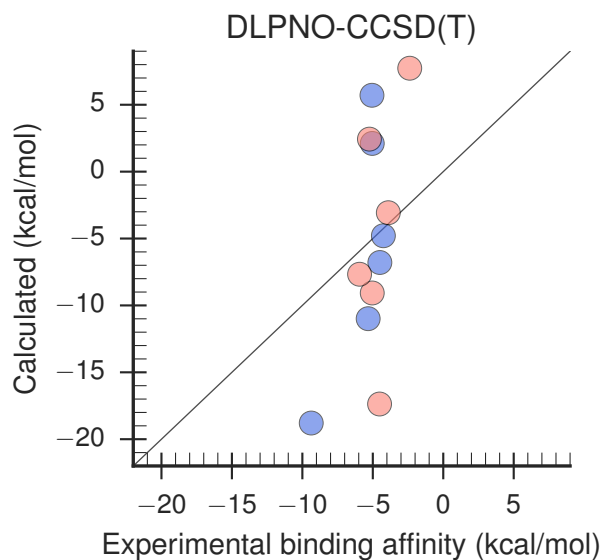

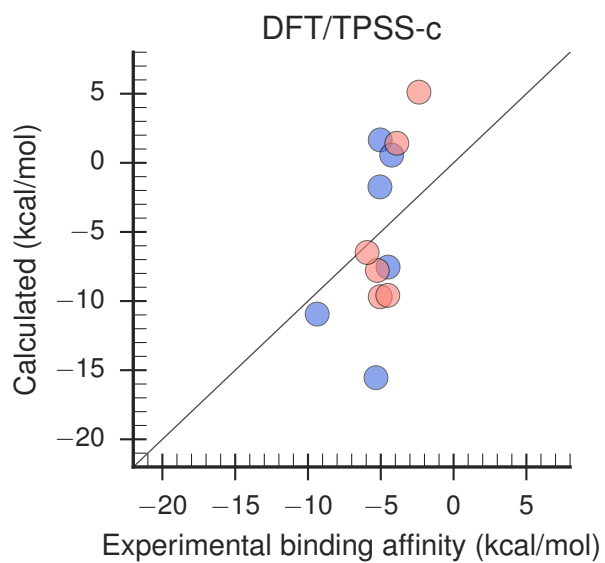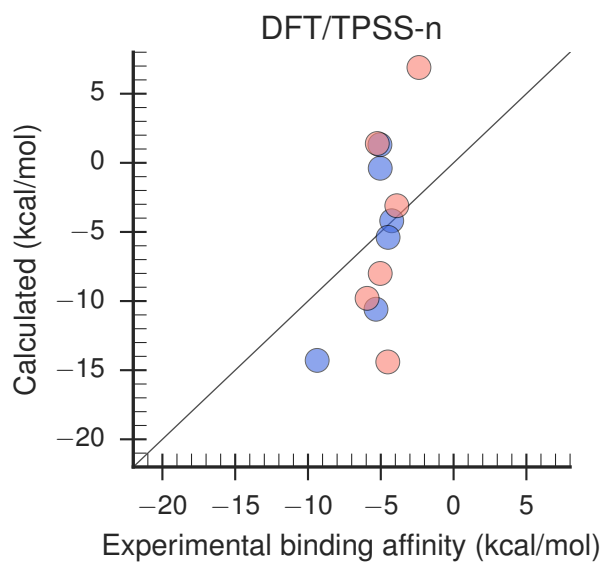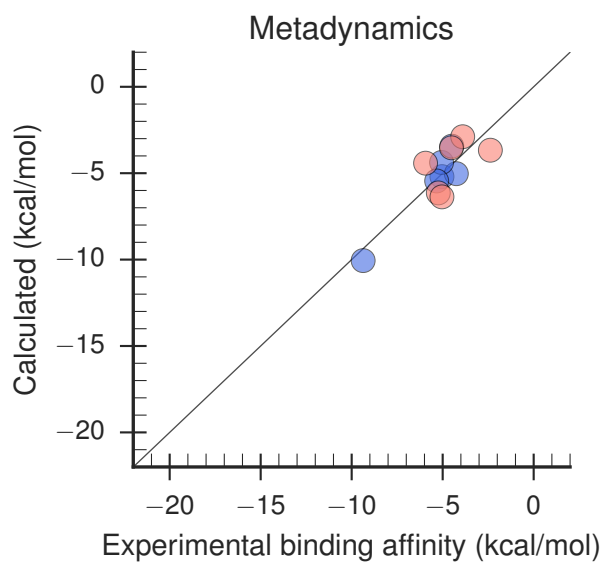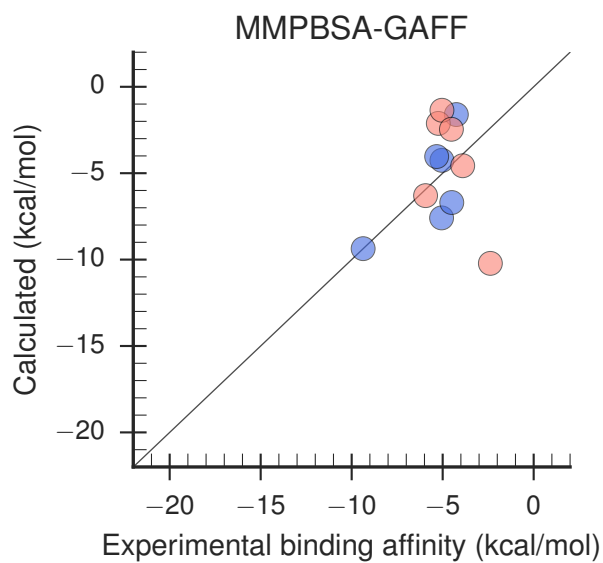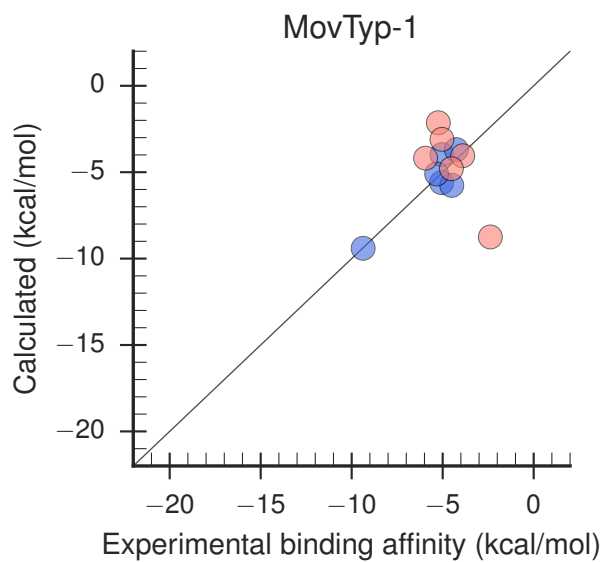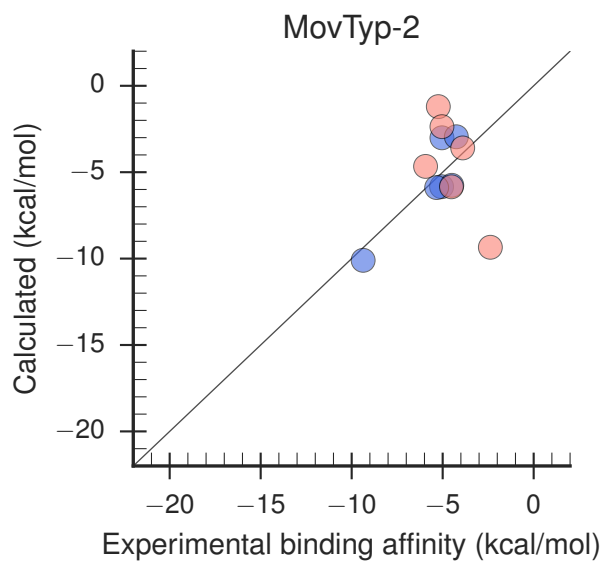



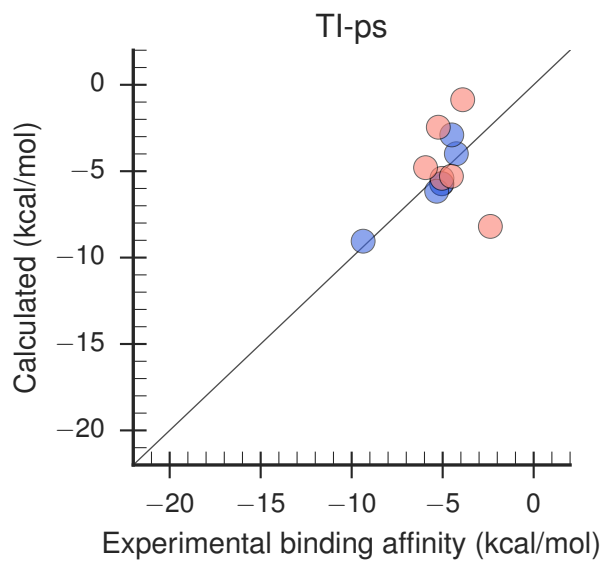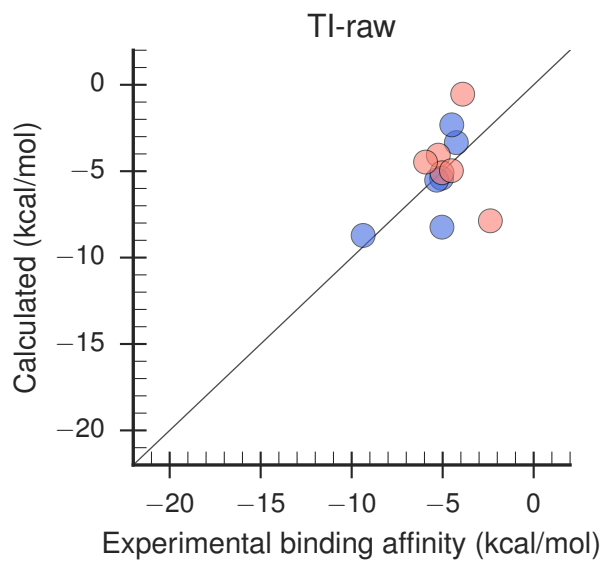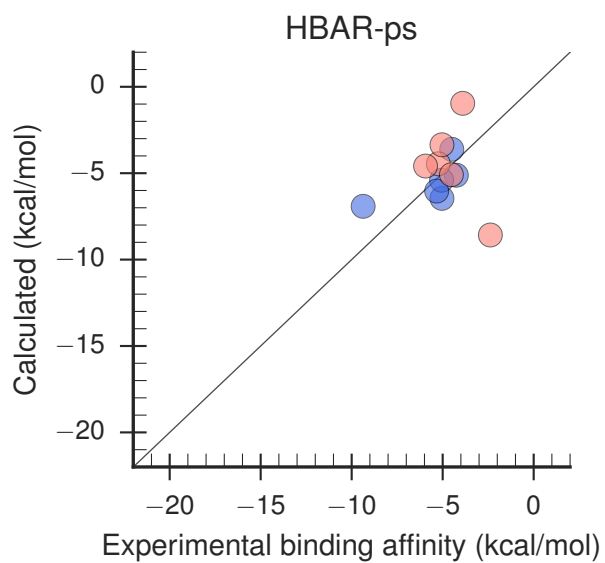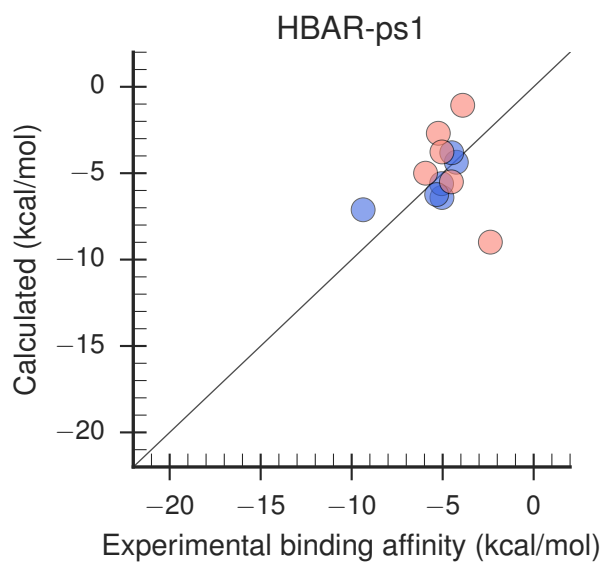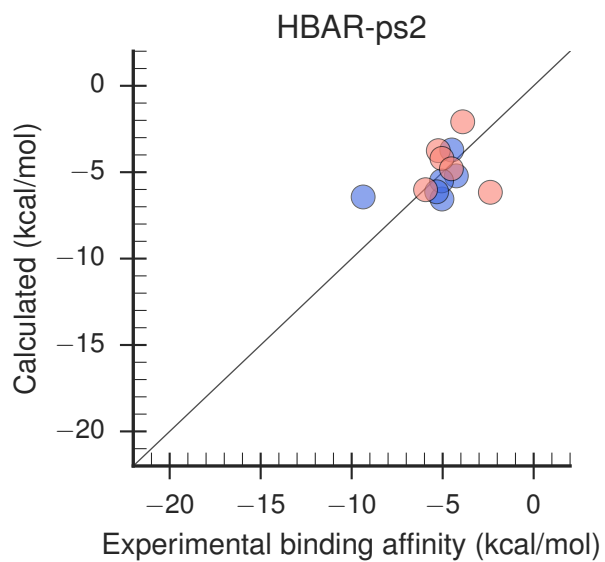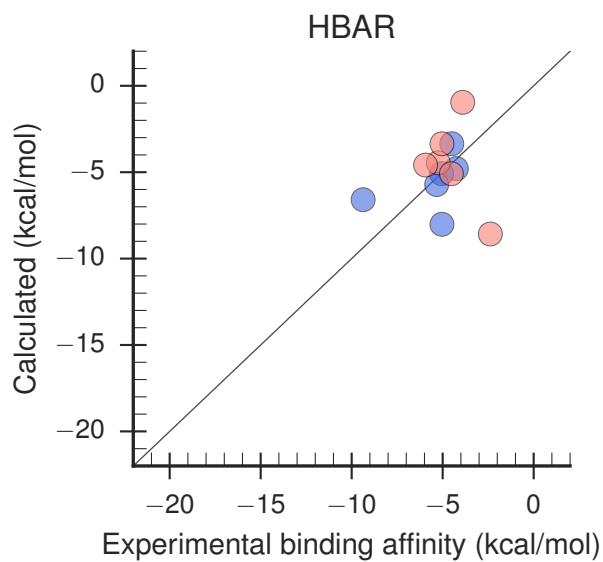

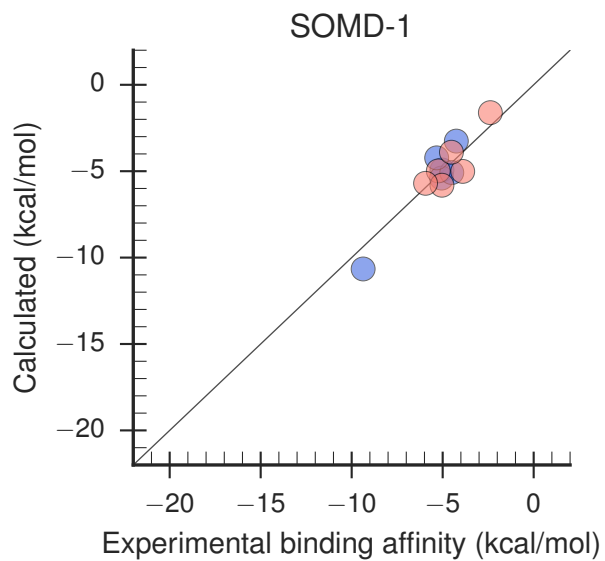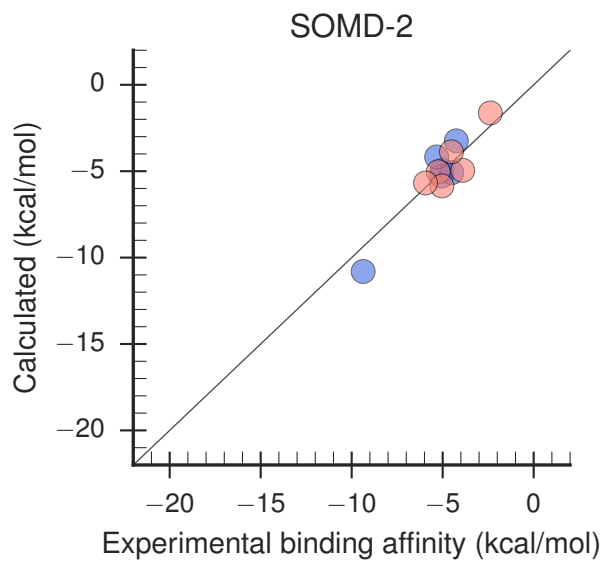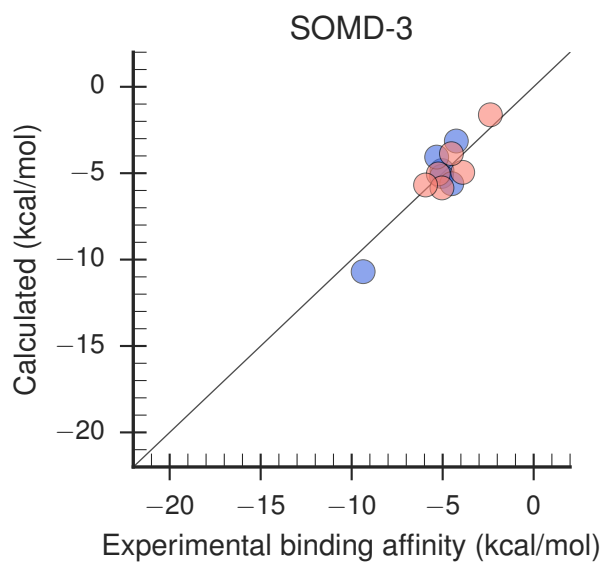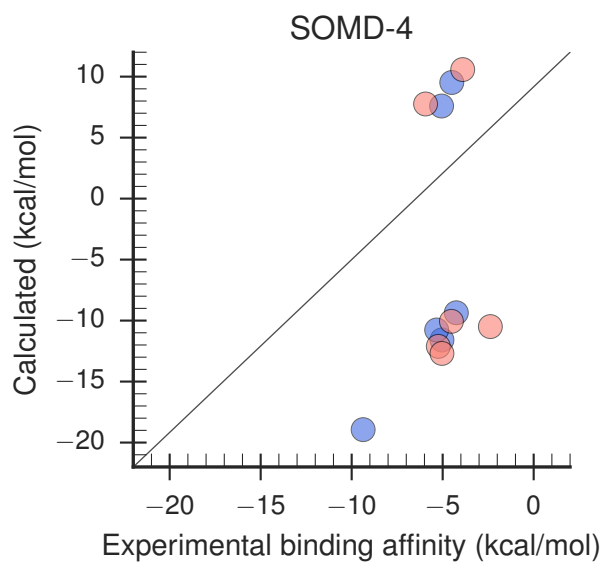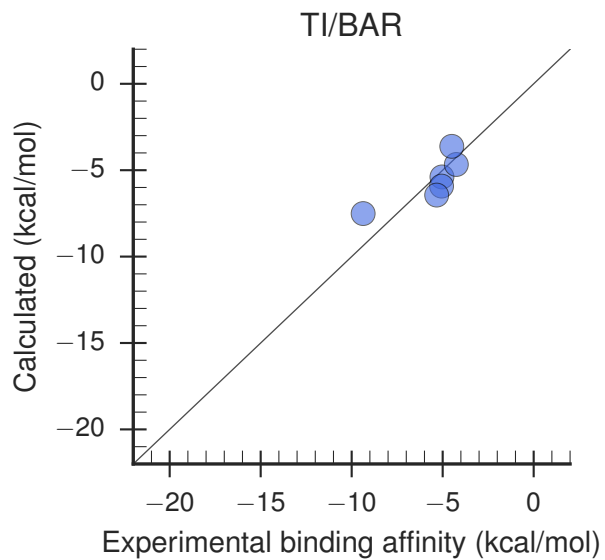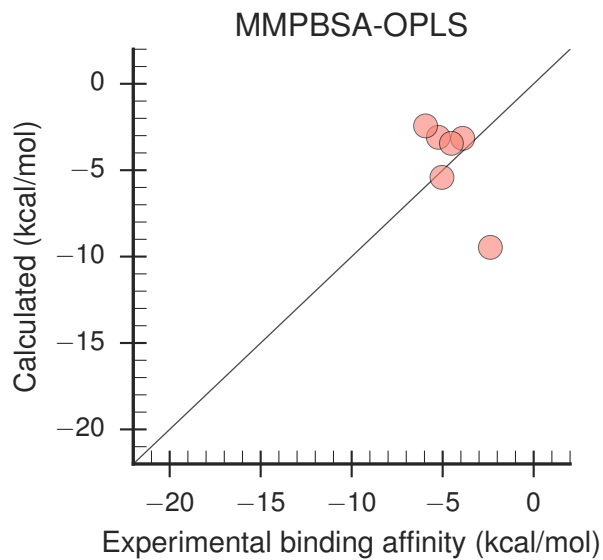

**Fig S2.** Combined OAH/OAMe predictions, two sets of predictions for the OAH or OAMe subset and two null models. Offsets equal to the mean signed error (MSE) of predicted binding affinities relative to the selected NMR/ITC binding affinities were applied. A constant value 0.0 were assigned to all guests in Null1 model, and the estimates in Null2 were generated based on the linear regression between the number of heavy atoms and experimental binding affinities of host OA in SAMPL4 challenge. Purple dots: OAH; red dots: OAMe; Solid black: line of identity.

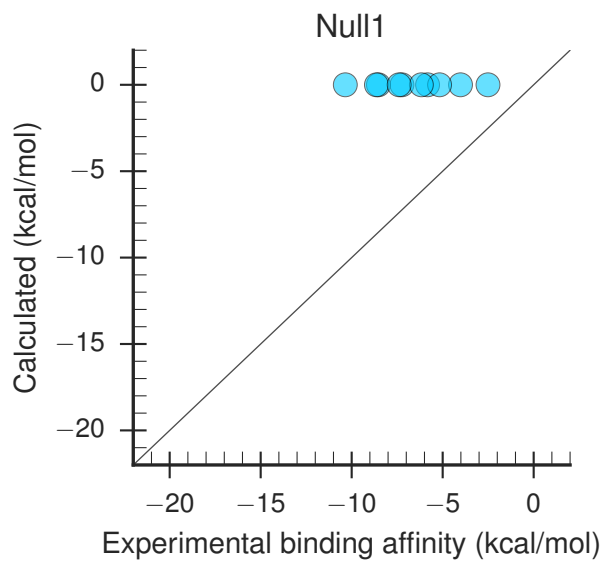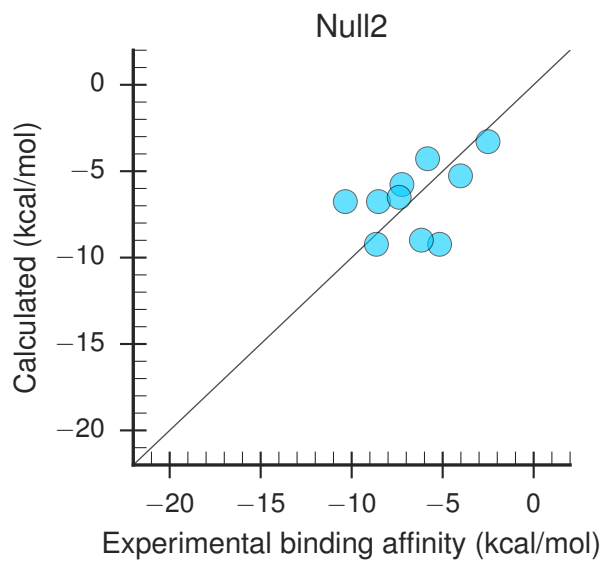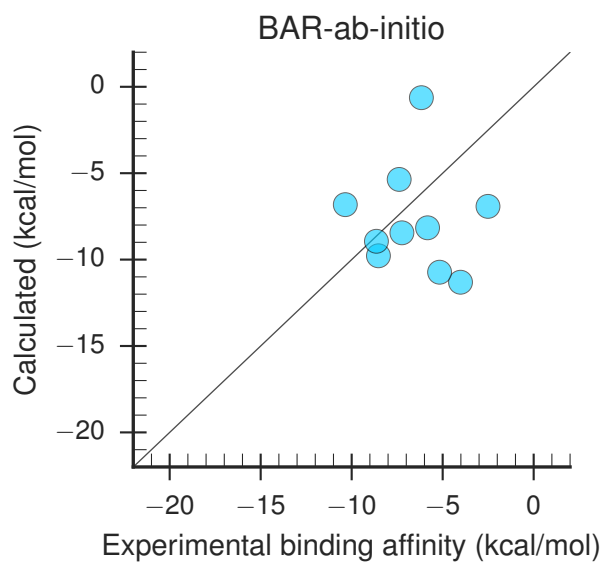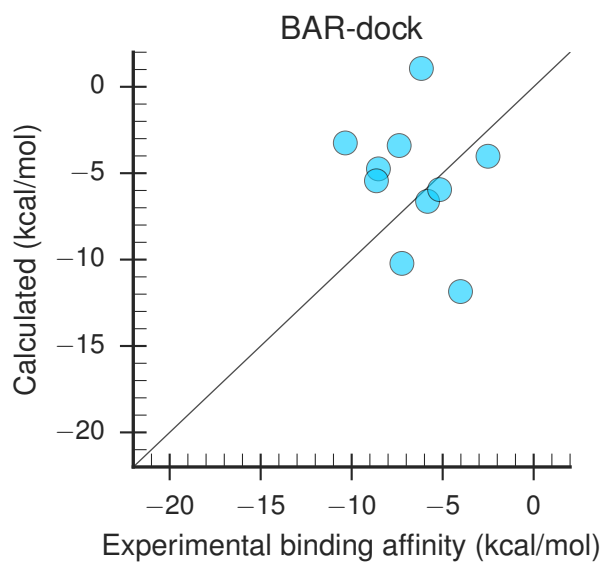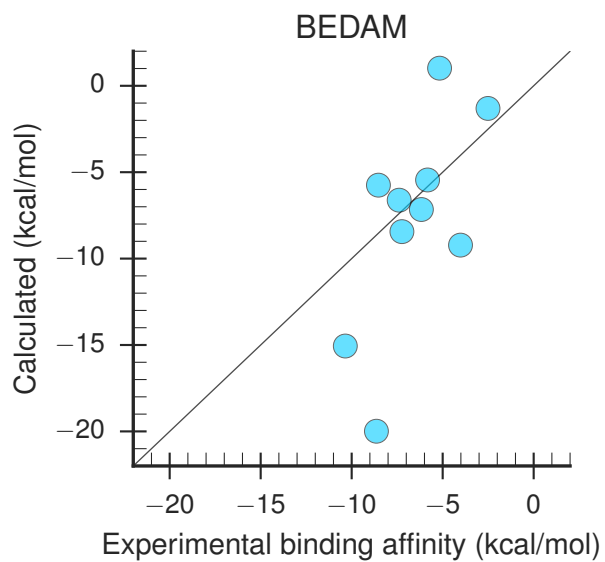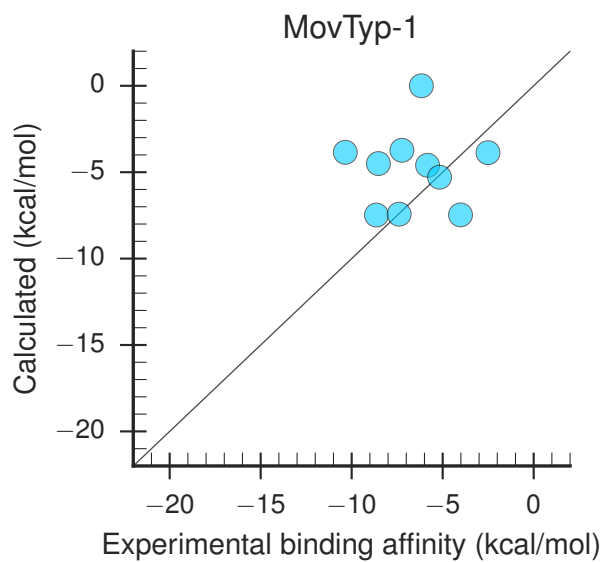

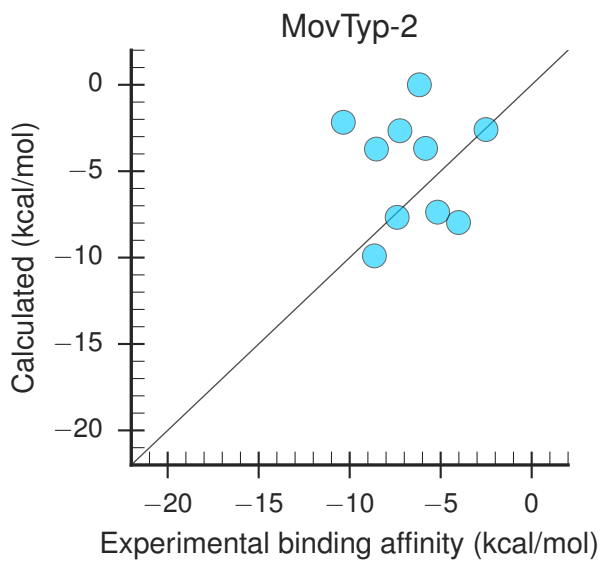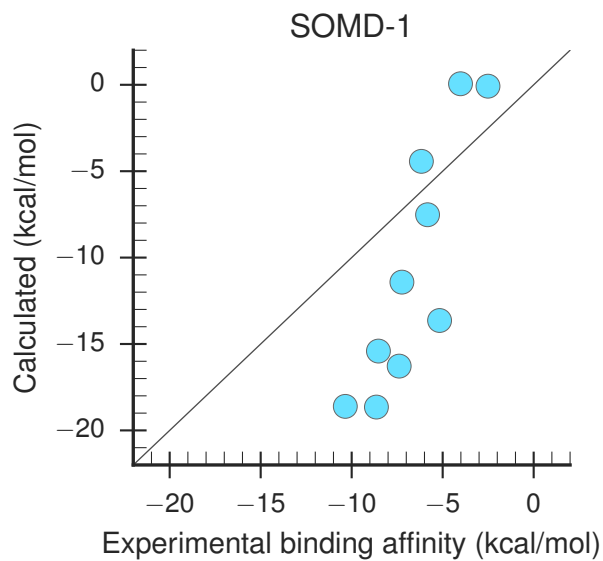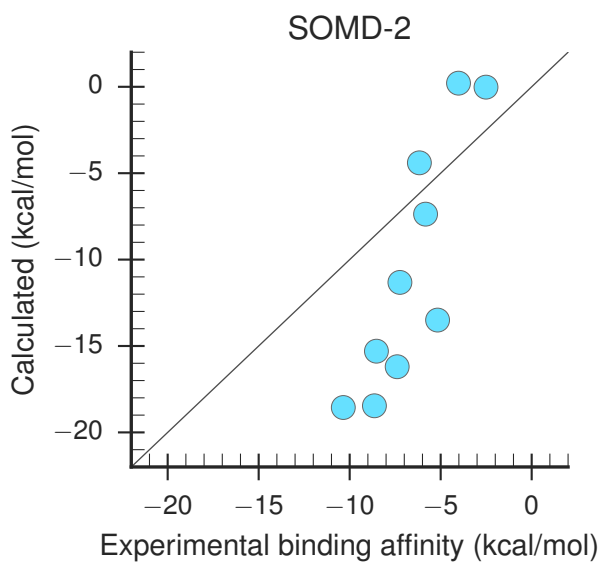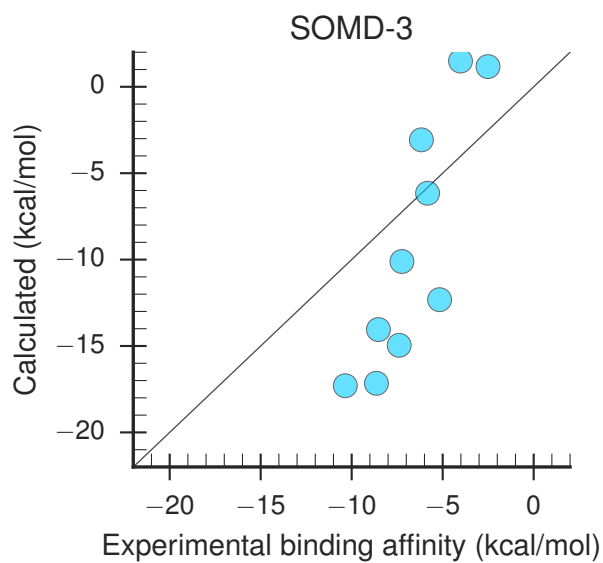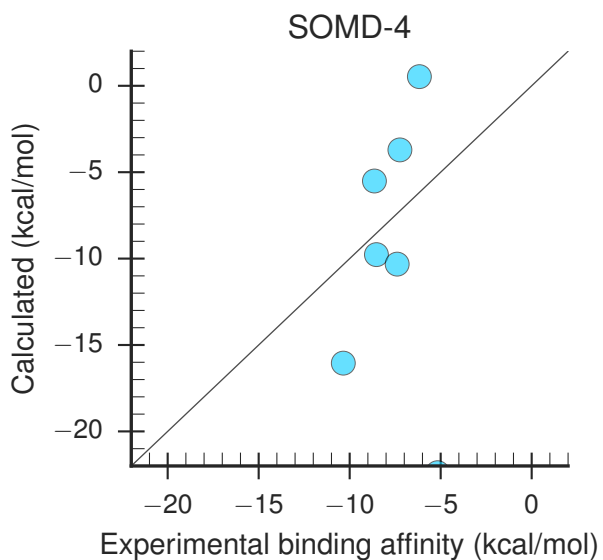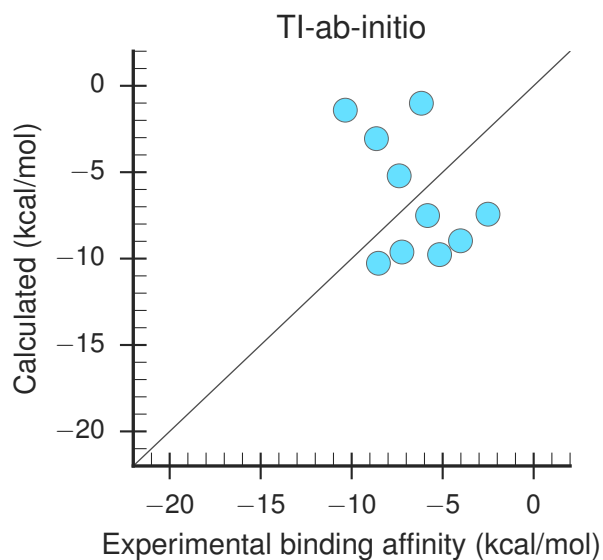

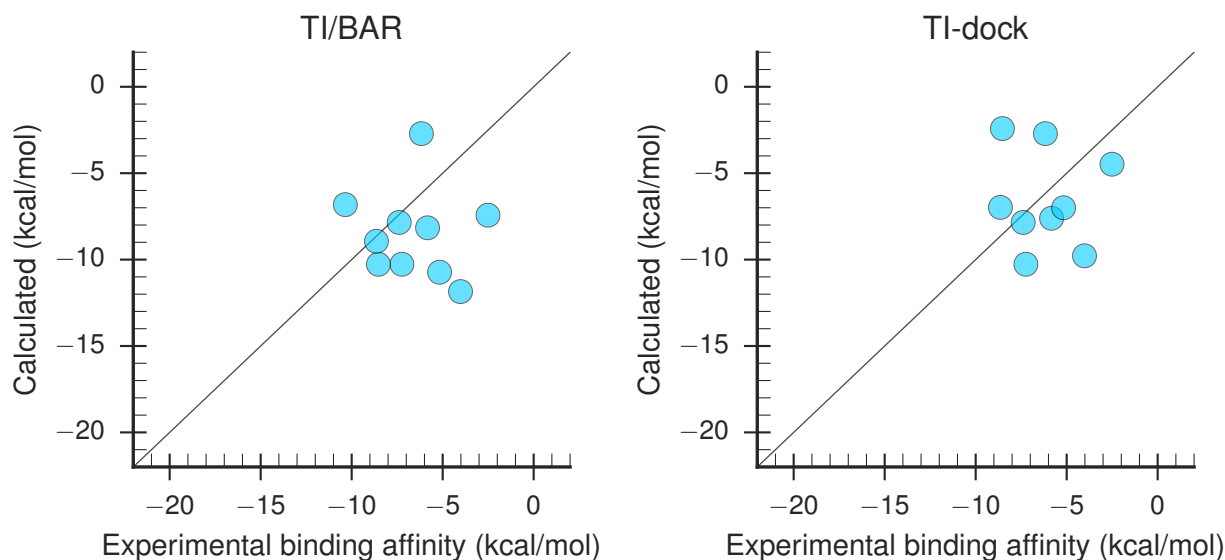

**Fig S3.** Submissions for CBClip systems and two null models. Original data from the submission files were compared to the experimental binding affinities. A constant value 0.0 was assigned to all guests for the Null1 model, and the estimates for the Null2 model were generated based on the linear regression between the number of heavy atoms and experimental binding affinities of host H1 in SAMPL3 challenge (see main text). The solid black line indicates perfect agreement.

### Python code for generating the error metrics with resampling and replacement

The python 3 code used to generate Figure 2-4 in the main text is shown below, which can also be found online at <https://github.com/GilsonLabUCSD/SAMPL5-bootstrapping-error-analysis/blob/master/SAMPL5-error-metrics.ipynb> and up to date versions, including the data files necessary to recreate the graphs, can be found online at <https://github.com/GilsonLabUCSD/SAMPL5-bootstrapping-error-analysis>.

```

# # Bootstrapping error metrics for SAMPL5

# This notebook reads in SAMPL5 submission data, performs bootstrapping on the uncertainties, and
plots the results.
# This file needs the following directory structure and will write pickles of the results if
`run_calculation = True` or
# read pickles of the results if `run_calculation = False`.
# `..`
#
# .
# |--- Calc-CB
# |   |--- BAR-ab-initio.txt
# |   |--- BAR-dock.txt
# |   |--- BEDAM.txt
# |   |--- CBClip-absolute.pickle (will be created if missing)
# |   |--- MovTyp-1.txt
# |   |--- MovTyp-2.txt
# |   |--- Null1.txt
# |   |--- Null2.txt
# |   |--- SOMD-1.txt
# |   |--- SOMD-2.txt
# |   |--- SOMD-3.txt
# |   |--- SOMD-4.txt
# |   |--- TI-ab-initio.txt
# |   |--- TI-dock.txt
# |   |--- TIXBar.txt
# |--- Calc-OA
# |   |--- APR-OPC.txt
# |   |--- APR-TIP3P.txt
# |   |--- BEDAM.txt
# |   |--- CCSD(T)-neutral.txt
# |   |--- DFT-charged.txt
# |   |--- DFT-neutral.txt
# |   |--- Metadynamics.txt
# |   |--- MMPBSA-GAFF.txt
# |   |--- MMPBSA-OPLS.txt
# |   |--- MovTyp-1.txt
# |   |--- MovTyp-2.txt
# |   |--- Null1.txt
# |   |--- Null2.txt
# |   |--- OAH-OAMe-absolute.pickle (will be created if missing)
# |   |--- OAH-OAMe-offset.pickle (will be created if missing)
# |   |--- OAH-OAMe-offset-allavg.pickle (will be created if missing)
# |   |--- OAHOnly-offset.pickle (will be created if missing)
# |   |--- OAMeOnly-offset.pickle (will be created if missing)
# |   |--- PERT-bound-c.txt
# |   |--- PERT-bound.txt
# |   |--- PERT-combo.txt
# |   |--- PERT-hrex-cl.txt
# |   |--- PERT-hrex-c2.txt
# |   |--- PERT-hrex-c.txt
# |   |--- PERT-hrex.txt
# |   |--- SOMD-1.txt
# |   |--- SOMD-2.txt
# |   |--- SOMD-3.txt
# |   |--- SOMD-4.txt
# |--- SAMPL5-error-metrics.ipynb (this file)
# |--- Exp
# |   |--- CBClip.txt
# |   |--- OAAllAvg.txt
# |   |--- OAEth10.txt
# |   |--- OASaltDep.txt
# `..`

get_ipython().system('date')

import sys, re
import numpy as np
from scipy import stats
import matplotlib as mpl
import matplotlib.pyplot as plt

```

```

# Wrangle the data
import pandas as pd
# Nice figures
import seaborn as sns
# Access data
import os
# Save the results of bootstrapping
import pickle

get_ipython().magic('matplotlib inline')
# LaTeX
mpl.rc('text', usetex=True)
# amsmath for \text{}
# helvetica to for Helvetica font
# sansmath to make math in Helvetica
mpl.rcParams['text.latex.preamble'] = [
    r'\usepackage{amsmath}',
    r'\usepackage{helvet}',
    r'\usepackage{sansmath}',
    r'\sansmath',
    r'\renewcommand{\familydefault}{\sfdefault}',
    r'\usepackage[T1]{fontenc}',
    r'\usepackage{graphicx}'
]

### Function definitions for setting the error metrics, reading the data, performing bootstrap
analysis,
# and plotting the results.

def geterrormetrics(x, y, Nm):
    """
    Returns an array MTmp that stores the output of the error metrics on data given in (x, y).
    Written by Niel.
    """
    MTmp = np.zeros([Nm], np.float64)
    # Slope, Intercept, R
    MTmp[0], MTmp[1], MTmp[2], pval, stderr = stats.linregress(x, y)
    # R^2
    MTmp[3] = MTmp[2] ** 2
    # RMSE
    MTmp[4] = np.sqrt(np.mean(((y - x) ** 2)))
    # MSE
    MTmp[5] = np.mean((y - x))
    # MUE
    MTmp[6] = np.mean(np.absolute(y - x))
    # Tau
    MTmp[7], prob = stats.kendalltau(x, y)
    if np.isnan(MTmp[7]):
        MTmp[7] = 0.0
    return (MTmp)

### Bootstrapping Definition
def bootstrap(x, xsem, y, ysem, Nm, BootCyc, OAHOnly, OAMeOnly, CalcPairDiffs, CorrectOA,
CorrectCB, WithUncert,
    WithRep):
    """
    Performs bootstrap error analysis on data (x, y) and errors (xsem, ysem) for a number
    of bootstrapping cycles given by BootCyc. The remaining parameters specify subsets of
    calculations
    that can be performed which are determined in the function `compute_bootstrap`.
    Returns an array of values, uncertainties, and MBoot which holds an array of all values for
    the error metrics for all bootstrapping cycles.
    Written by Niel.
    """
    MBoot = np.zeros([Nm, BootCyc], np.float64)
    MVals = np.zeros([Nm], np.float64)
    MSEMs = np.zeros([Nm], np.float64)

```



```

xtmp = np.zeros([len(x)], np.float64)
ytmp = np.zeros([len(x)], np.float64)
yfit = np.zeros([len(x)], np.float64)

for b in range(BootCyc):
    for i in range(len(x)):

        # Sample with/without replacement?
        if WithRep:
            j = np.random.randint(len(x))
        else:
            j = i

        # Sampling Statistical Uncertainty
        if not WithUncert or xsem[j] == 0.0:
            xtmp[i] = x[j]
        else:
            xtmp[i] = np.random.normal(x[j], xsem[j])
        if not WithUncert or ysem[j] == 0.0:
            ytmp[i] = y[j]
        else:
            ytmp[i] = np.random.normal(y[j], ysem[j])

    MBoot[0:Nm, b] = geterrormetrics(xtmp, ytmp, Nm)

for m in range(Nm):
    MVals[m] = np.mean(MBoot[m])
    MSEM[m] = np.std(MBoot[m])

return (MVals, MSEM, MBoot)

def compute_bootstrap(args):
    """
    Read in data from disk given by `args`, convert to common units if necessary,
    set calculation subsets, and call `bootstrap`.
    Returns the number of calculations (i.e., the number of data files), the name of those files,
    the raw (i.e., reported by submission) value of the error metrics, all bootstrapped values of
the
    error metrics, and all bootstrapped mean values.
    Written by Niel.
    """

    OAHOnly = False
    OAMeOnly = False
    CalcPairDiffs = False
    CorrectOA = False
    CorrectCB = False
    WithUncert = True
    WithRep = True

    ### Arguments: <Flags> <ExpType> <ExperimentFile> <CalculationFile1> [<CalculationFile2> ...]
    ### Note, files should have the same number of data points
    calcfiles = []
    for arg in args:
        if arg == 'OAHOnly':
            OAHOnly = True
        if arg == 'OAMeOnly':
            OAMeOnly = True
        if arg == 'CalcPairDiffs':
            CalcPairDiffs = True
        if arg == 'CorrectOA':
            CorrectOA = True
        if arg == 'CorrectCB':
            CorrectCB = True
        if re.search(r'^(ka|dg|dh)$', arg):
            exptype = arg
        if re.search(r'\.txt$', arg):
            if re.search(r'Exp', arg):
                expfile = arg
            else:

```

```

        calcfiles.append(arg)

### Settings
R = 0.0019872036
T = 298.0
BootCyc = 100000
MNames = ('Slope', 'Interc', 'R', 'R^2', 'RMSE', 'MSE', 'MUE', 'TAU')
Nm = len(MNames)

### Load experimental file and place data in array
# print(expfile)
with open(expfile, 'r') as exprow:
    explines = exprow.readlines()
exp = []
for line in explines:
    if not re.match(r'^\s*$', line):
        exp.append(line.rstrip().replace('\t', ' '))

### If "Only" flag, just do first six, or last six
if OAHOnly:
    exp = exp[0:6]
if OAMeOnly:
    exp = exp[6:12]
if OAHOnly and OAMeOnly:
    print("OAHOnly=True and OAMeOnly=True! Not compatible")
    exit()
N = len(exp) # Number of data points
Np = (N - 1) * N / 2 # Number of data pairs

### Are these binding constants or free energy (or enthalpy)? Convert.
emean = np.zeros([N], np.float64)
esem = np.zeros([N], np.float64)
for i in range(len(exp)):
    cols = np.asarray(exp[i].split(), dtype=np.float64)
    if exptype == 'ka':
        dG = -R * T * np.log(cols)
        emean[i] = np.mean(dG)
        esem[i] = np.std(dG, ddof=1) / np.sqrt(len(dG))
    elif exptype == 'dg':
        emean[i] = cols[0]
        esem[i] = cols[1]
    elif exptype == 'dh':
        emean[i] = np.mean(cols) / 1000
        esem[i] = np.std(cols, ddof=1) / np.sqrt(len(cols)) / 1000
    else:
        print(exptype, "... is not a valid experimental type")

### Calculate Experimental Pairwise Differences
if CalcPairDiffs:
    h = 0
    epmean = np.zeros([Np], np.float64)
    epsem = np.zeros([Np], np.float64)
    for i in range(len(exp)):
        for j in range(i + 1, len(exp)):
            epmean[h] = emean[i] - emean[j]
            epsem[h] = np.sqrt(esem[i]**2 + esem[j]**2)
            h += 1

### Read in Calculated data.
### I should add a check to make sure number of data points is the same as experiment
Nc = len(calcfiles)
cmean = np.zeros([Nc, N], np.float64)
csem = np.zeros([Nc, N], np.float64)
if CalcPairDiffs:
    cdmean = np.zeros([Nc, Nd], np.float64)
    cdsem = np.zeros([Nc, Nd], np.float64)

RawMs = np.zeros([Nc, Nm], np.float64)
AllMBoot = np.zeros([Nc, Nm, BootCyc], np.float64)
AllMVals = np.zeros([Nc, Nm], np.float64)
AllMSEMs = np.zeros([Nc, Nm], np.float64)

```

```

nc = 0
for calcfile in calcfiles:
    calc = np.loadtxt(calcfile, np.float64)
    if OAHOnly:
        calc = calc[0:6]
    if OAMeOnly:
        calc = calc[6:12]
    for i in range(len(calc)):
        if np.isscalar(calc[i]) == True: ### If scalar instead of array; ie, no SEM given.
            cmean[nc, i] = np.mean(calc[i])
            csem[nc, i] = 0.0
        else: ### Assume Mean and SEM given
            cmean[nc, i] = calc[i, 0]
            csem[nc, i] = calc[i, 1]

    ### Correct data set with MSE
    if CorrectOA:
        cmean[nc, 0:6] = cmean[nc, 0:6] - (np.mean(cmean[nc, 0:6]) - np.mean(emean[0:6]))
        if len(calc) == 12:
            cmean[nc, 6:12] = cmean[nc, 6:12] - (np.mean(cmean[nc, 6:12]) -
np.mean(emean[6:12]))
    if CorrectCB:
        cmean[nc, 0:10] = cmean[nc, 0:10] - (np.mean(cmean[nc, 0:10]) - np.mean(emean[0:10]))

    if CalcPairDiffs:
        h = 0
        for i in range(len(calc)):
            for j in range(i + 1, len(calc)):
                cpmean[nc, h] = cmean[nc, i] - cmean[nc, j]
                cpsem[nc, h] = np.sqrt(csem[nc, i] ** 2 + csem[nc, j] ** 2)
                h += 1

    RawMs[nc] = geterrormetrics(emean, cmean[nc], Nm)
    AllMVals[nc], AllMSEMs[nc], AllMBoot[nc] = bootstrap(emean, esem, cmean[nc], csem[nc],
Nm, BootCyc, OAHOnly, OAMeOnly,
CalcPairDiffs, CorrectOA, CorrectCB,
WithUncert, WithRep)

    nc += 1

CalcNames = []
for name in calcfiles:
    cols = name.split('.')
    CalcNames.append(cols[0])

return (RawMs, AllMBoot, AllMVals, AllMSEMs, CalcNames, Nc)

def plot_summary_horizontal_narrow(Nc, RawMs, AllMBoot, AllMVals, CalcNames, absolute, offset,
prefix, filename=None):
    """
    Make a horizontal violin plot (methods on the y-axis) of the bootstrapped error metrics and
    save to disk.
    Points are overlaid to represent the mean of each submission and lines are drawn
    to show the bootstrapped mean. For each error metric, a single graph is drawn:
    RMSE, slope, R squared, and Kendall tau. There is manual tweaking of names, labels,
    and colors.
    v2: The aspect ratio is changed to make the plots a bit more narrow and long.
    v3: Order first by reported mean, then bootstrapped mean for rounded values.
    v3: 'Slope' goes to 'm' and 'Tau' goes to '\tau'
    v3: Increase grid thickness
    v3: KDE bandwidth of 0.2 to reduce some jitteriness in the discrete tau values.
    Also, bigger font size.
    The figures are saved given by the parameter `filename`.
    """

    # Set the graph labels to different for absolute and offset calculations.
    if absolute:
        calculation_name = ["RMSE (kcal/mol)", "Abs(1-m)", "$R^{2}$", "$\tau$"]
    if offset:
        calculation_name = ["RMSE_o (kcal/mol)", "Abs(1-m_o)", "$R^{2}$_o", "$\tau_o$"]

```

```

calculation_index = [4, 0, 3, 7] # From Niel's MTmp

# Convert slope into abs(1-slope)
for n in range(Nc):
    tmp = RawMs[n, 0]
    RawMs[n, 0] = np.abs(1.0 - tmp)
    tmp = AllMBoot[n, 0]
    AllMBoot[n, 0] = np.abs(1.0 - tmp)
    AllMVals[n, 0] = np.mean(AllMBoot[n, 0])

for i in calculation_index:
    tmp = np.argsort(RawMs[0:Nc, i])
    Order = [j for j in tmp]
    # print('Calculation = {}, best method index = {}, best method name = {}'.format(i,
    #
np.argsort(RawMs[0:Nc, i])[0],
#
CalcNames[np.argsort(RawMs[0:Nc, i])[0]])
SS

# Order first by reported mean, then by bootstrapped distribution mean.
round_RawMs = np.around(RawMs[:, i], 2)
round_AllMVals = np.around(AllMVals[:, i], 2)
rounds = pd.DataFrame()
rounds['b'] = AllMVals[:, i]
rounds['r'] = round_RawMs
rounds['o'] = range(len(round_AllMVals))
rounds['m'] = [CalcNames[i] for i in range(len(AllMVals))]
# Reorder array based on raw value first, then mean of the bootstrapped distribution.
ordered = rounds.sort_values(['r', 'b'], inplace=False)
# Grab the values of the third column, which was original order, based on
# values of first two columns.
Order = ordered['o'].as_matrix()
# For R squared and Tau reverse the ordering so the graphs always present best to worst
case

# (left to right or top to bottom).
if calculation_name[calculation_index.index(i)] == '$R^{2}$' or calculation_name[
    calculation_index.index(i)] == '$\tau$' or
calculation_name[calculation_index.index(i)] == '$R^{2}$_{o}' or \
    calculation_name[calculation_index.index(i)] == '$\tau$_{o}':
    Order = ordered['o'].as_matrix()[::-1]

# Cleanup submission names grabbed from the filenames.
CalcNames = ['TI/BAR' if i == 'TIxBar' else i for i in CalcNames]
CalcNames = ['MovTyp-1*' if i == 'MovTyp-1' else i for i in CalcNames]
CalcNames = ['MovTyp-2*' if i == 'MovTyp-2' else i for i in CalcNames]
CalcNames = ['Null1*' if i == 'Null1' else i for i in CalcNames]
CalcNames = ['DFT-neutral*' if i == 'DFT-neutral' else i for i in CalcNames]
CalcNames = ['DFT-charged*' if i == 'DFT-charged' else i for i in CalcNames]
CalcNames = ['CCSD(T)-neutral*' if i == 'CCSD(T)-neutral' else i for i in CalcNames]

# Updated suggested names from reviewers...
CalcNames = ['DLPNO-CCSD(T)*' if i == 'CCSD(T)-neutral*' else i for i in CalcNames]
CalcNames = ['DFT/TPSS-c*' if i == 'DFT-charged*' else i for i in CalcNames]
CalcNames = ['DFT/TPSS-n*' if i == 'DFT-neutral*' else i for i in CalcNames]
CalcNames = ['TI-raw' if i == 'PERT-bound' else i for i in CalcNames]
CalcNames = ['TI-ps' if i == 'PERT-bound-c' else i for i in CalcNames]
CalcNames = ['TI/BAR' if i == 'PERT-combo' else i for i in CalcNames]
CalcNames = ['HBAR' if i == 'PERT-hrex' else i for i in CalcNames]
CalcNames = ['HBAR-ps' if i == 'PERT-hrex-c' else i for i in CalcNames]
CalcNames = ['HBAR-ps1' if i == 'PERT-hrex-c1' else i for i in CalcNames]
CalcNames = ['HBAR-ps2' if i == 'PERT-hrex-c2' else i for i in CalcNames]

# Exclude Null1 model from Tau calculation and plotting.
if i == 7 and absolute == True:
    # Exclude Null1 model from Tau calculation and plotting.
    element_to_remove = np.where([CalcNames[i] == 'Null1*' for i in Order])[0][0]
    Order_without_null1 = np.delete(Order, element_to_remove)
    Order = np.copy(Order_without_null1)

# Wrangle the data into a `DataFrame` so we can do categorical plotting with seaborn.
# The bootstrapped error distributions.

```

```

df = pd.DataFrame()
df['AllMBoot'] = np.hstack([[AllMBoot[n, i] for n in Order]])
df['Method'] = np.hstack([[np.repeat(CalcNames[n], len(AllMBoot[n, i])) for n in Order]])
# The 'raw' (i.e., submitted) values for the error metrics.
df2 = pd.DataFrame()
df2['RawMs'] = [RawMs[n, i] for n in Order]
df2['Method'] = [CalcNames[n] for n in Order]
# The bootstrapped error means.
df3 = pd.DataFrame()
df3['AllMVals'] = [AllMVals[n, i] for n in Order]
df3['Method'] = [CalcNames[n] for n in Order]
# Set axes labels for the submissions.
labels = [CalcNames[n] for n in Order]
# Blue for everything except red for null models.
palette = ['#4169e1' if i != 'Null1*' and i != 'Null2' else '#fa8072' for i in labels]

# Set up plot aesthetics.
sns.set_style("whitegrid", rc={'legend.frameon': False})
sns.set_context("paper", font_scale=3.0, rc={"lines.linewidth": 5, 'legend.frameon':
False})
sns.despine(left=True, bottom=True, right=True, top=True)
fig, ax = plt.subplots(1, figsize=(8, 19), dpi=300)
ax.grid(linewidth=2)
g = sns.violinplot(y='Method', x='AllMBoot', data=df, inner=None, linewidth=0,
palette=palette, cut=0,
orientation='h', split=True, scale='width', gridsize=400, bw=0.2)

for n in Order:
    # Plot the 'raw' (submitted) values for the error metrics as white circles with a
    black border
    ax.scatter(y=np.where(Order == n)[0], x=df2[df2['Method'] == CalcNames[n]]['RawMs'],
s=150, marker='o',
color='w', edgecolor='k', linewidth=2.5, zorder=21)
    # Plot the bootstrapped mean values as a line.
    # This gets the column position because we are plotting using `Order` and the width
of the line is 1/len(CalcNames).
    # We could shorten the line a little bit for better readability.
    ax.axvline(x=AllMVals[n, i], ymin=1 - (np.where(Order == n)[0] / len(Order) + 0.01),
ymax=1 - (np.where(Order == n)[0] / len(Order) + 1 / len(Order) - 0.01),
linewidth=2, c='k', lw=4, zorder=20, alpha=0.5)
    # This adds a bit of a white background around the lines by plotting underneath a
slightly larger line.
    ax.axvline(x=AllMVals[n, i], ymin=1 - (np.where(Order == n)[0] / len(Order) + 0.01),
ymax=1 - (np.where(Order == n)[0] / len(Order) + 1 / len(Order) - 0.01),
linewidth=2, c='w', lw=6, zorder=19, alpha=1.0)

plt.xlabel(calculation_name[calculation_index.index(i)], labelpad=10)
plt.ylabel('')
# Let's limit slope and R^2 for better aesthetics.
if calculation_name[calculation_index.index(i)] == '$R^{2}$' or calculation_name[
calculation_index.index(i)] == '$R^{2}$_o':
    ax.set_xlim([0, 1])
# Let's limit for Tau, too:
if calculation_name[calculation_index.index(i)] == '$\tau$' or calculation_name[
calculation_index.index(i)] == '$\tau$_o':
    ax.set_xlim([-1.0, 1.0])
# Fix the lower limit only for the Abs(1-slope) aesthetic.
if calculation_name[calculation_index.index(i)] == 'Abs(1-m)' or calculation_name[
calculation_index.index(i)] == 'Abs(1-m)_o':
    ax.set_xlim([0, 6])
if prefix != 'CBClip':
    if calculation_name[calculation_index.index(i)] == 'RMSE (kcal/mol)' or
calculation_name[
calculation_index.index(i)] == 'RMSE_o (kcal/mol)':
        ax.set_xlim([0, 14])
    else:
        if calculation_name[calculation_index.index(i)] == 'RMSE (kcal/mol)' or
calculation_name[
calculation_index.index(i)] == 'RMSE_o (kcal/mol)':
            ax.set_xlim([0, np.max(df2['RawMs']) + 0.5 * np.max(df2['RawMs'])])
ax.tick_params(axis='both', which='major', pad=5)

```

```

# Because LaTeX rendering, we have to escape these underscores...
if i == 0:
    if offset:
        latex_label = 'Abs(1- $\text{\text{m}}_{\text{\text{o}}}$ )$'
    if absolute:
        latex_label = 'Abs(1-m)'
if i == 4:
    if offset:
        latex_label = '$\text{\text{RMSE}}_{\text{\text{o}}}$ (kcal/mol)'
    if absolute:
        latex_label = 'RMSE (kcal/mol)'
if i == 3:
    if offset:
        latex_label = '$\text{\text{R}}^{\text{\text{2}}}_{\text{\text{o}}}$'
    if absolute:
        latex_label = '$\text{\text{R}}^{\text{\text{2}}}$'
if i == 7:
    if offset:
        latex_label = '$\text{\text{tau}}_{\text{\text{o}}}$'
    if absolute:
        latex_label = '$\text{\text{tau}}$'

plt.xlabel(latex_label)
plt.title(prefix, y=1.01)

if filename:
    if i == 0:
        label = 'slope'
    if i == 4:
        label = 'rmse'
    if i == 3:
        label = 'r-squared'
    if i == 7:
        label = 'tau'
    plt.tight_layout()
    plt.savefig(filename + '-' + str(label) + '-narrow.pdf', dpi=300, bbox_inches='tight',
pad_inches=0.3)
    return

def PrintTable(CalcNames, RawMs, AllMVals, AllMSEMs, AddDFT=False, Offset=False, OAHOnly=False,
OAMeOnly=False):
    """
    Print the method names and error metrics (RMSE, R2, m,  $\tau$ ) in a format ready
    for the SAMPL5 Overview manuscript.
    Using the same naming tweaks that Dave used above. (Should we put this in a
    function?)
    Print '-' for missing data.
    The format isn't aligned well because I'm using tabs so it will go directly into Excel/Word
    Written by Niel
    """
    # Cleanup submission names grabbed from the filenames.
    CalcNames = ['TI/BAR' if i == 'TixBar' else i for i in CalcNames]
    CalcNames = ['MovTyp-1*' if i == 'MovTyp-1' else i for i in CalcNames]
    CalcNames = ['MovTyp-2*' if i == 'MovTyp-2' else i for i in CalcNames]
    CalcNames = ['Null1*' if i == 'Null1' else i for i in CalcNames]
    CalcNames = ['DFT-neutral*' if i == 'DFT-neutral' else i for i in CalcNames]
    CalcNames = ['DFT-charged*' if i == 'DFT-charged' else i for i in CalcNames]
    CalcNames = ['CCSD(T)-neutral*' if i == 'CCSD(T)-neutral' else i for i in CalcNames]

    # Updated suggested names from reviewers...
    CalcNames = ['DLPNO-CCSD(T)*' if i == 'CCSD(T)-neutral*' else i for i in CalcNames]
    CalcNames = ['DFT/TPSS-c*' if i == 'DFT-charged*' else i for i in CalcNames]
    CalcNames = ['DFT/TPSS-n*' if i == 'DFT-neutral*' else i for i in CalcNames]
    CalcNames = ['TI-raw' if i == 'PERT-bound' else i for i in CalcNames]
    CalcNames = ['TI-ps' if i == 'PERT-bound-c' else i for i in CalcNames]
    CalcNames = ['TI/BAR' if i == 'PERT-combo' else i for i in CalcNames]
    CalcNames = ['HBAR' if i == 'PERT-hrex' else i for i in CalcNames]
    CalcNames = ['HBAR-ps' if i == 'PERT-hrex-c' else i for i in CalcNames]
    CalcNames = ['HBAR-ps1' if i == 'PERT-hrex-c1' else i for i in CalcNames]

```

```

CalcNames = ['HBAR-ps2' if i == 'PERT-hrex-c2' else i for i in CalcNames]

MetricNames = ['m', 'b', 'R', 'R^2', 'RMSE', 'MSE', 'MUE', 'tau']
calculation_index = [4, 3, 0, 7]
# calculation_index = [4, 6, 5, 3, 2, 0, 1, 7] ### All Metrics

# Print Header
if Offset:
    offchar = '_o'
else:
    offchar = ''
print("{0:12s}\t".format('Method'), end='')
for i in calculation_index:
    print("{0:14s}\t".format(MetricNames[i] + offchar), end='')
print('')

# Print Data
for n, name in enumerate(CalcNames):
    print("{0:12s}\t".format(name), end=''),
    for i in calculation_index:
        if AllMSEMs[n, i] == 0.0 or (i == 7 and name == "Null1*"):
            print(" - \t", end='')
        else:
            print("{0:.1f}({1:.1f} ± {2:.1f})\t".format(RawMs[n, i], AllMVals[n, i],
AllMSEMs[n, i]), end='')
    if AddDFT and name == 'BEDAM':
        for missname in "DFT/TPSS-c DFT/TPSS-n DLPNO-CCSD(T)".split():
            print('')
            print("{0:12s}\t".format(missname), end='')
            for j in range(len(calculation_index)):
                print(" - \t", end='')
    if OAHOnly and name == 'TI/BAR':
        print('')
        print("{0:12s}\t".format('MMPBSA-OPLS'), end='')
        for j in range(len(calculation_index)):
            print(" - \t", end='')
    if OAMeOnly and name == 'SOMD-4':
        print('')
        print("{0:12s}\t".format('TI/BAR'), end='')
        for j in range(len(calculation_index)):
            print(" - \t", end='')
    print('')

# ## Calculations and plotting!

# Path to data files (set absolute path if you execute cells out of order)
run_location = '.'

# If false, there needs to be .pickle files available from a previous run
run_calculation = False

# ConsistentSalt-Abs (Table 3)
os.chdir(run_location + '/Calc-OA')
string = 'ka ../Exp/OASaltDep.txt Null1.txt Null2.txt APR-OPC.txt APR-TIP3P.txt ' \
        'BEDAM.txt Metadynamics.txt MMPBSA-GAFF.txt MovTyp-1.txt MovTyp-2.txt ' \
        'PERT-bound-c.txt PERT-bound.txt PERT-hrex.txt PERT-hrex-c.txt PERT-hrex-cl.txt ' \
        'PERT-hrex-c2.txt SOMD-1.txt SOMD-2.txt SOMD-3.txt SOMD-4.txt'
args = string.split()
if run_calculation:
    RawMs, AllMBoot, AllMVals, AllMSEMs, CalcNames, Nc = compute_bootstrap(args)
    results = [RawMs, AllMBoot, AllMVals, AllMSEMs, CalcNames, Nc]
    pickle.dump(results, open('OAH-OAMe-absolute.pickle', 'wb'))
else:
    results = pickle.load(open('OAH-OAMe-absolute.pickle', 'rb'))
    RawMs, AllMBoot, AllMVals, AllMSEMs, CalcNames, Nc = results
PrintTable(CalcNames, RawMs, AllMVals, AllMSEMs, AddDFT=True)
# Why is RawMs being treated as global scope when it goes into plot_summary_horizontal_narrow?
plot_summary_horizontal_narrow(Nc, RawMs, AllMBoot, AllMVals, CalcNames, absolute=True,
offset=False, prefix='OAH/OAMe',

```

```

        filename='OAH-OAMe-absolute')

# ConsistentSalt-Offset (Table 3)
os.chdir('../')
os.chdir(run_location + '/Calc-OA')
string = 'CorrectOA ka ../Exp/OASaltDep.txt Null1.txt Null2.txt APR-OPC.txt ' \
        'APR-TIP3P.txt BEDAM.txt DFT-charged.txt DFT-neutral.txt CCSD(T)-neutral.txt ' \
        'Metadynamics.txt MMPBSA-GAFF.txt MovTyp-1.txt MovTyp-2.txt PERT-bound-c.txt ' \
        'PERT-bound.txt PERT-hrex.txt PERT-hrex-c.txt PERT-hrex-cl.txt PERT-hrex-c2.txt ' \
        'SOMD-1.txt SOMD-2.txt SOMD-3.txt SOMD-4.txt'
args = string.split()
if run_calculation:
    RawMs, AllMBoot, AllMVals, AllMSEMs, CalcNames, Nc = compute_bootstrap(args)
    results = [RawMs, AllMBoot, AllMVals, AllMSEMs, CalcNames, Nc]
    pickle.dump(results, open('OAH-OAMe-offset.pickle', 'wb'))
else:
    results = pickle.load(open('OAH-OAMe-offset.pickle', 'rb'))
    RawMs, AllMBoot, AllMVals, AllMSEMs, CalcNames, Nc = results
PrintTable(CalcNames, RawMs, AllMVals, AllMSEMs, Offset=True)
plot_summary_horizontal_narrow(Nc, RawMs, AllMBoot, AllMVals, CalcNames, absolute=False,
offset=True, prefix='OAH/OAMe',
        filename='OAH-OAMe-offset')

# ConsistentSalt-Offset-OAHOnly (Table 4)
os.chdir('../')
os.chdir(run_location + '/Calc-OA')
string = 'CorrectOA OAHOnly ka ../Exp/OASaltDep.txt Null1.txt Null2.txt APR-OPC.txt ' \
        'APR-TIP3P.txt BEDAM.txt DFT-charged.txt DFT-neutral.txt CCSD(T)-neutral.txt ' \
        'Metadynamics.txt MMPBSA-GAFF.txt MovTyp-1.txt MovTyp-2.txt PERT-bound-c.txt ' \
        'PERT-bound.txt PERT-hrex.txt PERT-hrex-c.txt PERT-hrex-cl.txt PERT-hrex-c2.txt ' \
        'SOMD-1.txt SOMD-2.txt SOMD-3.txt SOMD-4.txt PERT-combo.txt'
args = string.split()
if run_calculation:
    RawMs, AllMBoot, AllMVals, AllMSEMs, CalcNames, Nc = compute_bootstrap(args)
    results = [RawMs, AllMBoot, AllMVals, AllMSEMs, CalcNames, Nc]
    pickle.dump(results, open('OAHOnly-offset.pickle', 'wb'))
else:
    results = pickle.load(open('OAHOnly-offset.pickle', 'rb'))
    RawMs, AllMBoot, AllMVals, AllMSEMs, CalcNames, Nc = results
PrintTable(CalcNames, RawMs, AllMVals, AllMSEMs, Offset=True, OAHOnly=True)

# ConsistentSalt-Offset-OAMeOnly (Table 4)
os.chdir('../')
os.chdir(run_location + '/Calc-OA')
string = 'CorrectOA OAMeOnly ka ../Exp/OASaltDep.txt Null1.txt Null2.txt APR-OPC.txt ' \
        'APR-TIP3P.txt BEDAM.txt DFT-charged.txt DFT-neutral.txt CCSD(T)-neutral.txt ' \
        'Metadynamics.txt MMPBSA-GAFF.txt MovTyp-1.txt MovTyp-2.txt PERT-bound-c.txt ' \
        'PERT-bound.txt PERT-hrex.txt PERT-hrex-c.txt PERT-hrex-cl.txt PERT-hrex-c2.txt ' \
        'SOMD-1.txt SOMD-2.txt SOMD-3.txt SOMD-4.txt MMPBSA-OPLS.txt'
args = string.split()
if run_calculation:
    RawMs, AllMBoot, AllMVals, AllMSEMs, CalcNames, Nc = compute_bootstrap(args)
    results = [RawMs, AllMBoot, AllMVals, AllMSEMs, CalcNames, Nc]
    pickle.dump(results, open('OAMeOnly-offset.pickle', 'wb'))
else:
    results = pickle.load(open('OAMeOnly-offset.pickle', 'rb'))
    RawMs, AllMBoot, AllMVals, AllMSEMs, CalcNames, Nc = results
PrintTable(CalcNames, RawMs, AllMVals, AllMSEMs, Offset=True, OAMeOnly=True)

# CBClip-Abs (Table 5)
os.chdir('../')
os.chdir(run_location + '/Calc-CB')
string = 'ka ../Exp/CBClip.txt Null1.txt Null2.txt BAR-ab-initio.txt BAR-dock.txt ' \
        'TI-ab-initio.txt TI-dock.txt TIxBar.txt BEDAM.txt MovTyp-1.txt MovTyp-2.txt ' \
        'SOMD-1.txt SOMD-2.txt SOMD-3.txt SOMD-4.txt'
args = string.split()
if run_calculation:
    RawMs, AllMBoot, AllMVals, AllMSEMs, CalcNames, Nc = compute_bootstrap(args)
    results = [RawMs, AllMBoot, AllMVals, AllMSEMs, CalcNames, Nc]
    pickle.dump(results, open('CBClip-absolute.pickle', 'wb'))
else:

```



```

    results = pickle.load(open('CBClip-absolute.pickle', 'rb'))
    RawMs, AllMBoot, AllMVals, AllMSEMs, CalcNames, Nc = results
PrintTable(CalcNames, RawMs, AllMVals, AllMSEMs)
plot_summary_horizontal_narrow(Nc, RawMs, AllMBoot, AllMVals, CalcNames, absolute=True,
offset=False, prefix='CBClip',
                                filename='CBClip-absolute')

# AllAvg-Abs
os.chdir('../')
os.chdir(run_location + '/Calc-OA')
string = 'ka ../Exp/OAAllAvg.txt Null1.txt Null2.txt APR-OPC.txt APR-TIP3P.txt ' \
        'BEDAM.txt Metadynamics.txt MMPBSA-GAFF.txt MovTyp-1.txt MovTyp-2.txt ' \
        'PERT-bound-c.txt PERT-bound.txt PERT-hrex.txt PERT-hrex-c.txt PERT-hrex-cl.txt ' \
        'PERT-hrex-c2.txt SOMD-1.txt SOMD-2.txt SOMD-3.txt SOMD-4.txt'
args = string.split()
if run_calculation:
    RawMs, AllMBoot, AllMVals, AllMSEMs, CalcNames, Nc = compute_bootstrap(args)
    results = [RawMs, AllMBoot, AllMVals, AllMSEMs, CalcNames, Nc]
    pickle.dump(results, open('OAH-OAMe-absolute-allavg.pickle', 'wb'))
else:
    results = pickle.load(open('OAH-OAMe-absolute-allavg.pickle', 'rb'))
    RawMs, AllMBoot, AllMVals, AllMSEMs, CalcNames, Nc = results
PrintTable(CalcNames, RawMs, AllMVals, AllMSEMs, AddDFT=True)

# AllAvg-Offset
os.chdir('../')
os.chdir(run_location + '/Calc-OA')
string = 'CorrectOA ka ../Exp/OAAllAvg.txt Null1.txt Null2.txt APR-OPC.txt ' \
        'APR-TIP3P.txt BEDAM.txt DFT-charged.txt DFT-neutral.txt CCSD(T)-neutral.txt ' \
        'Metadynamics.txt MMPBSA-GAFF.txt MovTyp-1.txt MovTyp-2.txt PERT-bound-c.txt ' \
        'PERT-bound.txt PERT-hrex.txt PERT-hrex-c.txt PERT-hrex-cl.txt PERT-hrex-c2.txt ' \
        'SOMD-1.txt SOMD-2.txt SOMD-3.txt SOMD-4.txt'
args = string.split()
if run_calculation:
    RawMs, AllMBoot, AllMVals, AllMSEMs, CalcNames, Nc = compute_bootstrap(args)
    results = [RawMs, AllMBoot, AllMVals, AllMSEMs, CalcNames, Nc]
    pickle.dump(results, open('OAH-OAMe-offset-allavg.pickle', 'wb'))
else:
    results = pickle.load(open('OAH-OAMe-offset-allavg.pickle', 'rb'))
    RawMs, AllMBoot, AllMVals, AllMSEMs, CalcNames, Nc = results
PrintTable(CalcNames, RawMs, AllMVals, AllMSEMs, Offset=True)

```

## Starting structures of free hosts provided to the SAMPL5 participants (in PDB format)

### OAH

|      |    |     |     |   |   |        |        |        |      |      |
|------|----|-----|-----|---|---|--------|--------|--------|------|------|
| ATOM | 1  | C1  | OCT | X | 1 | 1.978  | -2.913 | 2.556  | 0.00 | 0.00 |
| ATOM | 2  | C2  | OCT | X | 1 | 3.789  | -0.891 | 1.798  | 0.00 | 0.00 |
| ATOM | 3  | C3  | OCT | X | 1 | 2.095  | -1.737 | 3.319  | 0.00 | 0.00 |
| ATOM | 4  | C4  | OCT | X | 1 | 2.809  | -3.113 | 1.440  | 0.00 | 0.00 |
| ATOM | 5  | C5  | OCT | X | 1 | 3.750  | -2.126 | 1.094  | 0.00 | 0.00 |
| ATOM | 6  | C6  | OCT | X | 1 | 2.873  | -0.651 | 2.862  | 0.00 | 0.00 |
| ATOM | 7  | O1  | OCT | X | 1 | 4.548  | 0.204  | 1.313  | 0.00 | 0.00 |
| ATOM | 8  | C7  | OCT | X | 1 | 2.984  | 0.584  | 3.717  | 0.00 | 0.00 |
| ATOM | 9  | C8  | OCT | X | 1 | 3.932  | 1.363  | 0.655  | 0.00 | 0.00 |
| ATOM | 10 | O2  | OCT | X | 1 | 3.658  | 2.395  | 1.672  | 0.00 | 0.00 |
| ATOM | 11 | C9  | OCT | X | 1 | 2.364  | 2.527  | 2.188  | 0.00 | 0.00 |
| ATOM | 12 | C10 | OCT | X | 1 | 2.015  | 1.664  | 3.219  | 0.00 | 0.00 |
| ATOM | 13 | C11 | OCT | X | 1 | 0.711  | 1.822  | 3.759  | 0.00 | 0.00 |
| ATOM | 14 | C12 | OCT | X | 1 | 1.508  | 3.442  | 1.630  | 0.00 | 0.00 |
| ATOM | 15 | C13 | OCT | X | 1 | -0.186 | 2.733  | 3.185  | 0.00 | 0.00 |
| ATOM | 16 | C14 | OCT | X | 1 | 0.221  | 3.530  | 2.110  | 0.00 | 0.00 |
| ATOM | 17 | O3  | OCT | X | 1 | -0.647 | 4.303  | 1.401  | 0.00 | 0.00 |
| ATOM | 18 | C15 | OCT | X | 1 | -1.653 | 2.755  | 3.681  | 0.00 | 0.00 |
| ATOM | 19 | C16 | OCT | X | 1 | -2.574 | 1.870  | 2.877  | 0.00 | 0.00 |
| ATOM | 20 | C17 | OCT | X | 1 | -3.132 | 2.412  | 1.652  | 0.00 | 0.00 |
| ATOM | 21 | C18 | OCT | X | 1 | -1.538 | 3.660  | 0.425  | 0.00 | 0.00 |
| ATOM | 22 | O4  | OCT | X | 1 | -2.783 | 3.646  | 1.111  | 0.00 | 0.00 |
| ATOM | 23 | O5  | OCT | X | 1 | 2.544  | -4.128 | 0.497  | 0.00 | 0.00 |
| ATOM | 24 | C19 | OCT | X | 1 | 0.819  | -3.840 | 2.830  | 0.00 | 0.00 |
| ATOM | 25 | C20 | OCT | X | 1 | -0.432 | -3.444 | 2.049  | 0.00 | 0.00 |
| ATOM | 26 | O6  | OCT | X | 1 | 0.282  | -4.753 | -0.020 | 0.00 | 0.00 |
| ATOM | 27 | C21 | OCT | X | 1 | -0.654 | -3.991 | 0.770  | 0.00 | 0.00 |
| ATOM | 28 | C22 | OCT | X | 1 | -3.975 | 1.673  | 0.870  | 0.00 | 0.00 |
| ATOM | 29 | C23 | OCT | X | 1 | -4.264 | 0.367  | 1.137  | 0.00 | 0.00 |
| ATOM | 30 | C24 | OCT | X | 1 | -1.802 | -3.727 | 0.033  | 0.00 | 0.00 |
| ATOM | 31 | C25 | OCT | X | 1 | -2.775 | -2.918 | 0.554  | 0.00 | 0.00 |
| ATOM | 32 | O7  | OCT | X | 1 | -4.839 | -0.410 | 0.131  | 0.00 | 0.00 |
| ATOM | 33 | O8  | OCT | X | 1 | -3.844 | -2.574 | -0.224 | 0.00 | 0.00 |
| ATOM | 34 | C26 | OCT | X | 1 | -3.930 | -1.164 | -0.733 | 0.00 | 0.00 |
| ATOM | 35 | C27 | OCT | X | 1 | -1.468 | -2.726 | 2.607  | 0.00 | 0.00 |
| ATOM | 36 | C28 | OCT | X | 1 | -2.672 | -2.464 | 1.903  | 0.00 | 0.00 |
| ATOM | 37 | C29 | OCT | X | 1 | -2.927 | 0.510  | 3.198  | 0.00 | 0.00 |
| ATOM | 38 | C30 | OCT | X | 1 | -3.920 | -1.740 | 2.617  | 0.00 | 0.00 |
| ATOM | 39 | C31 | OCT | X | 1 | -3.767 | -0.267 | 2.328  | 0.00 | 0.00 |
| ATOM | 40 | C32 | OCT | X | 1 | 1.448  | -3.948 | -0.413 | 0.00 | 0.00 |
| ATOM | 41 | C33 | OCT | X | 1 | -1.723 | 2.568  | 5.183  | 0.00 | 0.00 |
| ATOM | 42 | C34 | OCT | X | 1 | -3.116 | 2.732  | 5.795  | 0.00 | 0.00 |
| ATOM | 43 | C35 | OCT | X | 1 | -3.094 | 2.468  | 7.322  | 0.00 | 0.00 |
| ATOM | 44 | O9  | OCT | X | 1 | -2.147 | 1.947  | 7.819  | 0.00 | 0.00 |
| ATOM | 45 | C36 | OCT | X | 1 | 2.971  | 0.333  | 5.244  | 0.00 | 0.00 |
| ATOM | 46 | C37 | OCT | X | 1 | 3.474  | 1.504  | 6.068  | 0.00 | 0.00 |
| ATOM | 47 | C38 | OCT | X | 1 | 4.965  | 1.511  | 5.971  | 0.00 | 0.00 |
| ATOM | 48 | O10 | OCT | X | 1 | 5.655  | 0.841  | 6.749  | 0.00 | 0.00 |
| ATOM | 49 | C39 | OCT | X | 1 | 0.619  | -4.262 | 4.357  | 0.00 | 0.00 |
| ATOM | 50 | C40 | OCT | X | 1 | -0.442 | -5.344 | 4.488  | 0.00 | 0.00 |
| ATOM | 51 | C41 | OCT | X | 1 | 0.254  | -6.613 | 4.033  | 0.00 | 0.00 |
| ATOM | 52 | O11 | OCT | X | 1 | 1.048  | -7.176 | 4.790  | 0.00 | 0.00 |
| ATOM | 53 | C42 | OCT | X | 1 | -3.973 | -2.277 | 4.180  | 0.00 | 0.00 |
| ATOM | 54 | C43 | OCT | X | 1 | -5.178 | -1.580 | 4.856  | 0.00 | 0.00 |
| ATOM | 55 | C44 | OCT | X | 1 | -5.150 | -1.922 | 6.342  | 0.00 | 0.00 |
| ATOM | 56 | O12 | OCT | X | 1 | -4.272 | -1.622 | 7.098  | 0.00 | 0.00 |

|      |     |     |     |   |   |        |        |        |      |      |
|------|-----|-----|-----|---|---|--------|--------|--------|------|------|
| ATOM | 57  | C45 | OCT | X | 1 | 4.853  | 1.891  | -0.409 | 0.00 | 0.00 |
| ATOM | 58  | C46 | OCT | X | 1 | 6.419  | 2.722  | -2.526 | 0.00 | 0.00 |
| ATOM | 59  | C47 | OCT | X | 1 | 4.806  | 3.188  | -0.838 | 0.00 | 0.00 |
| ATOM | 60  | C48 | OCT | X | 1 | 5.701  | 1.021  | -1.069 | 0.00 | 0.00 |
| ATOM | 61  | C49 | OCT | X | 1 | 6.516  | 1.418  | -2.128 | 0.00 | 0.00 |
| ATOM | 62  | C50 | OCT | X | 1 | 5.539  | 3.576  | -1.883 | 0.00 | 0.00 |
| ATOM | 63  | C51 | OCT | X | 1 | 1.924  | -4.169 | -1.843 | 0.00 | 0.00 |
| ATOM | 64  | C52 | OCT | X | 1 | 2.574  | -4.172 | -4.542 | 0.00 | 0.00 |
| ATOM | 65  | C53 | OCT | X | 1 | 1.045  | -4.683 | -2.706 | 0.00 | 0.00 |
| ATOM | 66  | C54 | OCT | X | 1 | 3.164  | -3.671 | -2.347 | 0.00 | 0.00 |
| ATOM | 67  | C55 | OCT | X | 1 | 3.512  | -3.700 | -3.673 | 0.00 | 0.00 |
| ATOM | 68  | C56 | OCT | X | 1 | 1.359  | -4.680 | -4.087 | 0.00 | 0.00 |
| ATOM | 69  | C57 | OCT | X | 1 | -4.364 | -1.263 | -2.171 | 0.00 | 0.00 |
| ATOM | 70  | C58 | OCT | X | 1 | -5.103 | -1.290 | -4.808 | 0.00 | 0.00 |
| ATOM | 71  | C59 | OCT | X | 1 | -5.192 | -0.247 | -2.658 | 0.00 | 0.00 |
| ATOM | 72  | C60 | OCT | X | 1 | -3.934 | -2.346 | -3.026 | 0.00 | 0.00 |
| ATOM | 73  | C61 | OCT | X | 1 | -4.279 | -2.305 | -4.398 | 0.00 | 0.00 |
| ATOM | 74  | C62 | OCT | X | 1 | -5.509 | -0.217 | -4.001 | 0.00 | 0.00 |
| ATOM | 75  | C63 | OCT | X | 1 | -1.585 | 4.405  | -0.927 | 0.00 | 0.00 |
| ATOM | 76  | C64 | OCT | X | 1 | -1.514 | 5.285  | -3.524 | 0.00 | 0.00 |
| ATOM | 77  | C65 | OCT | X | 1 | -2.738 | 4.357  | -1.719 | 0.00 | 0.00 |
| ATOM | 78  | C66 | OCT | X | 1 | -0.357 | 4.883  | -1.423 | 0.00 | 0.00 |
| ATOM | 79  | C67 | OCT | X | 1 | -0.365 | 5.285  | -2.742 | 0.00 | 0.00 |
| ATOM | 80  | C68 | OCT | X | 1 | -2.680 | 4.755  | -2.998 | 0.00 | 0.00 |
| ATOM | 81  | O13 | OCT | X | 1 | 4.656  | -3.132 | -4.231 | 0.00 | 0.00 |
| ATOM | 82  | O14 | OCT | X | 1 | -3.921 | -3.316 | -5.269 | 0.00 | 0.00 |
| ATOM | 83  | O15 | OCT | X | 1 | -6.153 | 0.774  | -4.597 | 0.00 | 0.00 |
| ATOM | 84  | O16 | OCT | X | 1 | 7.371  | 0.558  | -2.749 | 0.00 | 0.00 |
| ATOM | 85  | O17 | OCT | X | 1 | 5.564  | 4.887  | -2.369 | 0.00 | 0.00 |
| ATOM | 86  | O18 | OCT | X | 1 | -3.800 | 4.813  | -3.884 | 0.00 | 0.00 |
| ATOM | 87  | O19 | OCT | X | 1 | 0.847  | 5.553  | -3.374 | 0.00 | 0.00 |
| ATOM | 88  | C69 | OCT | X | 1 | -3.125 | -4.382 | -4.843 | 0.00 | 0.00 |
| ATOM | 89  | C70 | OCT | X | 1 | -1.388 | -6.331 | -3.996 | 0.00 | 0.00 |
| ATOM | 90  | C71 | OCT | X | 1 | -1.766 | -4.242 | -5.099 | 0.00 | 0.00 |
| ATOM | 91  | C72 | OCT | X | 1 | -3.620 | -5.488 | -4.090 | 0.00 | 0.00 |
| ATOM | 92  | C73 | OCT | X | 1 | -2.747 | -6.471 | -3.632 | 0.00 | 0.00 |
| ATOM | 93  | C74 | OCT | X | 1 | -0.884 | -5.201 | -4.698 | 0.00 | 0.00 |
| ATOM | 94  | O20 | OCT | X | 1 | 0.436  | -5.077 | -4.966 | 0.00 | 0.00 |
| ATOM | 95  | C75 | OCT | X | 1 | 7.014  | -0.794 | -2.812 | 0.00 | 0.00 |
| ATOM | 96  | C76 | OCT | X | 1 | 6.603  | -3.480 | -2.776 | 0.00 | 0.00 |
| ATOM | 97  | C77 | OCT | X | 1 | 7.868  | -1.619 | -2.056 | 0.00 | 0.00 |
| ATOM | 98  | C78 | OCT | X | 1 | 5.857  | -1.299 | -3.437 | 0.00 | 0.00 |
| ATOM | 99  | C79 | OCT | X | 1 | 5.691  | -2.675 | -3.448 | 0.00 | 0.00 |
| ATOM | 100 | C80 | OCT | X | 1 | 7.644  | -2.951 | -2.013 | 0.00 | 0.00 |
| ATOM | 101 | C81 | OCT | X | 1 | -6.108 | 2.039  | -4.170 | 0.00 | 0.00 |
| ATOM | 102 | C82 | OCT | X | 1 | -6.042 | 4.566  | -3.046 | 0.00 | 0.00 |
| ATOM | 103 | C83 | OCT | X | 1 | -7.256 | 2.507  | -3.505 | 0.00 | 0.00 |
| ATOM | 104 | C84 | OCT | X | 1 | -4.968 | 2.764  | -4.247 | 0.00 | 0.00 |
| ATOM | 105 | C85 | OCT | X | 1 | -4.902 | 4.035  | -3.665 | 0.00 | 0.00 |
| ATOM | 106 | C86 | OCT | X | 1 | -7.216 | 3.792  | -2.924 | 0.00 | 0.00 |
| ATOM | 107 | C87 | OCT | X | 1 | -8.342 | 4.264  | -2.014 | 0.00 | 0.00 |
| ATOM | 108 | O21 | OCT | X | 1 | -9.273 | 3.577  | -1.677 | 0.00 | 0.00 |
| ATOM | 109 | C88 | OCT | X | 1 | 3.543  | 9.301  | -1.437 | 0.00 | 0.00 |
| ATOM | 110 | O22 | OCT | X | 1 | 4.604  | 9.675  | -1.044 | 0.00 | 0.00 |
| ATOM | 111 | C89 | OCT | X | 1 | 8.522  | -3.870 | -1.065 | 0.00 | 0.00 |
| ATOM | 112 | O23 | OCT | X | 1 | 8.505  | -5.024 | -1.277 | 0.00 | 0.00 |
| ATOM | 113 | O24 | OCT | X | 1 | -4.010 | 2.747  | 7.993  | 0.00 | 0.00 |
| ATOM | 114 | O25 | OCT | X | 1 | -6.186 | -2.444 | 6.728  | 0.00 | 0.00 |
| ATOM | 115 | O26 | OCT | X | 1 | 0.095  | -6.983 | 2.900  | 0.00 | 0.00 |
| ATOM | 116 | C90 | OCT | X | 1 | -3.155 | -7.597 | -2.769 | 0.00 | 0.00 |
| ATOM | 117 | O27 | OCT | X | 1 | -2.341 | -8.300 | -2.191 | 0.00 | 0.00 |
| ATOM | 118 | O28 | OCT | X | 1 | 2.509  | 9.998  | -1.355 | 0.00 | 0.00 |
| ATOM | 119 | O29 | OCT | X | 1 | -8.324 | 5.429  | -1.640 | 0.00 | 0.00 |

|      |     |     |     |   |   |        |        |        |      |      |
|------|-----|-----|-----|---|---|--------|--------|--------|------|------|
| ATOM | 120 | O30 | OCT | X | 1 | -4.375 | -7.763 | -2.582 | 0.00 | 0.00 |
| ATOM | 121 | O31 | OCT | X | 1 | 9.054  | -3.461 | -0.061 | 0.00 | 0.00 |
| ATOM | 122 | O32 | OCT | X | 1 | 5.522  | 2.279  | 5.195  | 0.00 | 0.00 |
| ATOM | 123 | C91 | OCT | X | 1 | 4.411  | 5.670  | -2.419 | 0.00 | 0.00 |
| ATOM | 124 | C92 | OCT | X | 1 | 2.175  | 7.280  | -2.247 | 0.00 | 0.00 |
| ATOM | 125 | C93 | OCT | X | 1 | 3.154  | 5.130  | -2.838 | 0.00 | 0.00 |
| ATOM | 126 | C94 | OCT | X | 1 | 4.539  | 7.013  | -1.988 | 0.00 | 0.00 |
| ATOM | 127 | C95 | OCT | X | 1 | 3.389  | 7.886  | -1.858 | 0.00 | 0.00 |
| ATOM | 128 | C96 | OCT | X | 1 | 2.037  | 5.990  | -2.767 | 0.00 | 0.00 |
| ATOM | 129 | H1  | OCT | X | 1 | 1.314  | -1.538 | 4.047  | 0.00 | 0.00 |
| ATOM | 130 | H2  | OCT | X | 1 | 4.395  | -2.261 | 0.229  | 0.00 | 0.00 |
| ATOM | 131 | H3  | OCT | X | 1 | 3.941  | 1.091  | 3.577  | 0.00 | 0.00 |
| ATOM | 132 | H4  | OCT | X | 1 | 2.952  | 1.069  | 0.250  | 0.00 | 0.00 |
| ATOM | 133 | H5  | OCT | X | 1 | 0.467  | 1.098  | 4.533  | 0.00 | 0.00 |
| ATOM | 134 | H6  | OCT | X | 1 | 1.843  | 4.022  | 0.774  | 0.00 | 0.00 |
| ATOM | 135 | H7  | OCT | X | 1 | -1.997 | 3.784  | 3.552  | 0.00 | 0.00 |
| ATOM | 136 | H8  | OCT | X | 1 | -1.286 | 2.608  | 0.223  | 0.00 | 0.00 |
| ATOM | 137 | H9  | OCT | X | 1 | 1.122  | -4.790 | 2.385  | 0.00 | 0.00 |
| ATOM | 138 | H10 | OCT | X | 1 | -4.370 | 2.125  | -0.036 | 0.00 | 0.00 |
| ATOM | 139 | H11 | OCT | X | 1 | -1.891 | -4.197 | -0.944 | 0.00 | 0.00 |
| ATOM | 140 | H12 | OCT | X | 1 | -2.873 | -0.867 | -0.683 | 0.00 | 0.00 |
| ATOM | 141 | H13 | OCT | X | 1 | -1.500 | -2.400 | 3.644  | 0.00 | 0.00 |
| ATOM | 142 | H14 | OCT | X | 1 | -2.532 | 0.040  | 4.095  | 0.00 | 0.00 |
| ATOM | 143 | H15 | OCT | X | 1 | -4.883 | -1.929 | 2.138  | 0.00 | 0.00 |
| ATOM | 144 | H16 | OCT | X | 1 | 1.041  | -2.929 | -0.343 | 0.00 | 0.00 |
| ATOM | 145 | H17 | OCT | X | 1 | -1.264 | 1.614  | 5.448  | 0.00 | 0.00 |
| ATOM | 146 | H18 | OCT | X | 1 | -1.085 | 3.347  | 5.606  | 0.00 | 0.00 |
| ATOM | 147 | H19 | OCT | X | 1 | -3.414 | 3.770  | 5.630  | 0.00 | 0.00 |
| ATOM | 148 | H20 | OCT | X | 1 | -3.774 | 1.984  | 5.347  | 0.00 | 0.00 |
| ATOM | 149 | H21 | OCT | X | 1 | 3.406  | -0.656 | 5.402  | 0.00 | 0.00 |
| ATOM | 150 | H22 | OCT | X | 1 | 1.996  | 0.097  | 5.676  | 0.00 | 0.00 |
| ATOM | 151 | H23 | OCT | X | 1 | 3.011  | 2.450  | 5.779  | 0.00 | 0.00 |
| ATOM | 152 | H24 | OCT | X | 1 | 3.270  | 1.145  | 7.080  | 0.00 | 0.00 |
| ATOM | 153 | H25 | OCT | X | 1 | 1.554  | -4.578 | 4.823  | 0.00 | 0.00 |
| ATOM | 154 | H26 | OCT | X | 1 | 0.270  | -3.368 | 4.877  | 0.00 | 0.00 |
| ATOM | 155 | H27 | OCT | X | 1 | -0.679 | -5.340 | 5.554  | 0.00 | 0.00 |
| ATOM | 156 | H28 | OCT | X | 1 | -1.368 | -5.264 | 3.915  | 0.00 | 0.00 |
| ATOM | 157 | H29 | OCT | X | 1 | -4.199 | -3.340 | 4.277  | 0.00 | 0.00 |
| ATOM | 158 | H30 | OCT | X | 1 | -3.135 | -2.014 | 4.830  | 0.00 | 0.00 |
| ATOM | 159 | H31 | OCT | X | 1 | -5.092 | -0.496 | 4.762  | 0.00 | 0.00 |
| ATOM | 160 | H32 | OCT | X | 1 | -6.105 | -1.869 | 4.357  | 0.00 | 0.00 |
| ATOM | 161 | H33 | OCT | X | 1 | 6.926  | 3.160  | -3.381 | 0.00 | 0.00 |
| ATOM | 162 | H34 | OCT | X | 1 | 4.022  | 3.841  | -0.465 | 0.00 | 0.00 |
| ATOM | 163 | H35 | OCT | X | 1 | 5.818  | 0.034  | -0.628 | 0.00 | 0.00 |
| ATOM | 164 | H36 | OCT | X | 1 | 2.747  | -4.136 | -5.614 | 0.00 | 0.00 |
| ATOM | 165 | H37 | OCT | X | 1 | 0.027  | -4.951 | -2.431 | 0.00 | 0.00 |
| ATOM | 166 | H38 | OCT | X | 1 | 3.824  | -3.227 | -1.606 | 0.00 | 0.00 |
| ATOM | 167 | H39 | OCT | X | 1 | -5.329 | -1.262 | -5.872 | 0.00 | 0.00 |
| ATOM | 168 | H40 | OCT | X | 1 | -5.436 | 0.603  | -2.026 | 0.00 | 0.00 |
| ATOM | 169 | H41 | OCT | X | 1 | -3.285 | -3.112 | -2.607 | 0.00 | 0.00 |
| ATOM | 170 | H42 | OCT | X | 1 | -1.580 | 5.825  | -4.465 | 0.00 | 0.00 |
| ATOM | 171 | H43 | OCT | X | 1 | -3.625 | 3.890  | -1.298 | 0.00 | 0.00 |
| ATOM | 172 | H44 | OCT | X | 1 | 0.549  | 4.837  | -0.824 | 0.00 | 0.00 |
| ATOM | 173 | H45 | OCT | X | 1 | -0.683 | -7.078 | -3.639 | 0.00 | 0.00 |
| ATOM | 174 | H46 | OCT | X | 1 | -1.448 | -3.328 | -5.595 | 0.00 | 0.00 |
| ATOM | 175 | H47 | OCT | X | 1 | -4.698 | -5.582 | -3.982 | 0.00 | 0.00 |
| ATOM | 176 | H48 | OCT | X | 1 | 6.286  | -4.519 | -2.731 | 0.00 | 0.00 |
| ATOM | 177 | H49 | OCT | X | 1 | 8.671  | -1.164 | -1.482 | 0.00 | 0.00 |
| ATOM | 178 | H50 | OCT | X | 1 | 5.075  | -0.643 | -3.812 | 0.00 | 0.00 |
| ATOM | 179 | H51 | OCT | X | 1 | -6.130 | 5.577  | -2.656 | 0.00 | 0.00 |
| ATOM | 180 | H52 | OCT | X | 1 | -8.178 | 1.933  | -3.529 | 0.00 | 0.00 |
| ATOM | 181 | H53 | OCT | X | 1 | -4.108 | 2.291  | -4.715 | 0.00 | 0.00 |
| ATOM | 182 | H54 | OCT | X | 1 | 1.273  | 7.875  | -2.370 | 0.00 | 0.00 |

|      |     |     |     |   |   |       |       |        |      |      |
|------|-----|-----|-----|---|---|-------|-------|--------|------|------|
| ATOM | 183 | H55 | OCT | X | 1 | 3.063 | 4.090 | -3.141 | 0.00 | 0.00 |
| ATOM | 184 | H56 | OCT | X | 1 | 5.499 | 7.465 | -1.750 | 0.00 | 0.00 |
| END  |     |     |     |   |   |       |       |        |      |      |

## OAMe

|      |    |     |     |   |   |        |        |        |      |      |
|------|----|-----|-----|---|---|--------|--------|--------|------|------|
| ATOM | 1  | C1  | OCB | X | 1 | 2.059  | -2.526 | 2.919  | 0.00 | 0.00 |
| ATOM | 2  | C2  | OCB | X | 1 | 3.765  | -0.415 | 2.140  | 0.00 | 0.00 |
| ATOM | 3  | C3  | OCB | X | 1 | 2.121  | -1.325 | 3.660  | 0.00 | 0.00 |
| ATOM | 4  | C4  | OCB | X | 1 | 2.869  | -2.623 | 1.775  | 0.00 | 0.00 |
| ATOM | 5  | C5  | OCB | X | 1 | 3.753  | -1.604 | 1.419  | 0.00 | 0.00 |
| ATOM | 6  | C6  | OCB | X | 1 | 2.978  | -0.262 | 3.289  | 0.00 | 0.00 |
| ATOM | 7  | O1  | OCB | X | 1 | 4.589  | 0.587  | 1.695  | 0.00 | 0.00 |
| ATOM | 8  | C7  | OCB | X | 1 | 3.010  | 1.075  | 4.038  | 0.00 | 0.00 |
| ATOM | 9  | C8  | OCB | X | 1 | 3.854  | 1.602  | 0.976  | 0.00 | 0.00 |
| ATOM | 10 | O2  | OCB | X | 1 | 3.612  | 2.767  | 1.787  | 0.00 | 0.00 |
| ATOM | 11 | C9  | OCB | X | 1 | 2.333  | 2.775  | 2.281  | 0.00 | 0.00 |
| ATOM | 12 | C10 | OCB | X | 1 | 1.975  | 2.006  | 3.396  | 0.00 | 0.00 |
| ATOM | 13 | C11 | OCB | X | 1 | 0.630  | 2.053  | 3.816  | 0.00 | 0.00 |
| ATOM | 14 | C12 | OCB | X | 1 | 1.407  | 3.597  | 1.637  | 0.00 | 0.00 |
| ATOM | 15 | C13 | OCB | X | 1 | -0.336 | 2.866  | 3.172  | 0.00 | 0.00 |
| ATOM | 16 | C14 | OCB | X | 1 | 0.073  | 3.601  | 2.045  | 0.00 | 0.00 |
| ATOM | 17 | O3  | OCB | X | 1 | -0.785 | 4.371  | 1.295  | 0.00 | 0.00 |
| ATOM | 18 | C15 | OCB | X | 1 | -1.789 | 2.927  | 3.675  | 0.00 | 0.00 |
| ATOM | 19 | C16 | OCB | X | 1 | -2.651 | 1.928  | 2.902  | 0.00 | 0.00 |
| ATOM | 20 | C17 | OCB | X | 1 | -3.197 | 2.278  | 1.655  | 0.00 | 0.00 |
| ATOM | 21 | C18 | OCB | X | 1 | -1.656 | 3.550  | 0.490  | 0.00 | 0.00 |
| ATOM | 22 | O4  | OCB | X | 1 | -2.973 | 3.506  | 1.080  | 0.00 | 0.00 |
| ATOM | 23 | O5  | OCB | X | 1 | 2.817  | -3.711 | 0.939  | 0.00 | 0.00 |
| ATOM | 24 | C19 | OCB | X | 1 | 1.089  | -3.668 | 3.273  | 0.00 | 0.00 |
| ATOM | 25 | C20 | OCB | X | 1 | -0.228 | -3.456 | 2.521  | 0.00 | 0.00 |
| ATOM | 26 | O6  | OCB | X | 1 | 0.639  | -4.578 | 0.548  | 0.00 | 0.00 |
| ATOM | 27 | C21 | OCB | X | 1 | -0.378 | -3.938 | 1.213  | 0.00 | 0.00 |
| ATOM | 28 | C22 | OCB | X | 1 | -3.972 | 1.381  | 0.921  | 0.00 | 0.00 |
| ATOM | 29 | C23 | OCB | X | 1 | -4.117 | 0.071  | 1.371  | 0.00 | 0.00 |
| ATOM | 30 | C24 | OCB | X | 1 | -1.588 | -3.806 | 0.533  | 0.00 | 0.00 |
| ATOM | 31 | C25 | OCB | X | 1 | -2.639 | -3.096 | 1.114  | 0.00 | 0.00 |
| ATOM | 32 | O7  | OCB | X | 1 | -4.781 | -0.799 | 0.539  | 0.00 | 0.00 |
| ATOM | 33 | O8  | OCB | X | 1 | -3.778 | -2.940 | 0.362  | 0.00 | 0.00 |
| ATOM | 34 | C26 | OCB | X | 1 | -3.846 | -1.614 | -0.199 | 0.00 | 0.00 |
| ATOM | 35 | C27 | OCB | X | 1 | -1.311 | -2.754 | 3.093  | 0.00 | 0.00 |
| ATOM | 36 | C28 | OCB | X | 1 | -2.535 | -2.581 | 2.415  | 0.00 | 0.00 |
| ATOM | 37 | C29 | OCB | X | 1 | -2.855 | 0.609  | 3.356  | 0.00 | 0.00 |
| ATOM | 38 | C30 | OCB | X | 1 | -3.698 | -1.799 | 3.041  | 0.00 | 0.00 |
| ATOM | 39 | C31 | OCB | X | 1 | -3.588 | -0.337 | 2.606  | 0.00 | 0.00 |
| ATOM | 40 | C32 | OCB | X | 1 | 1.644  | -3.646 | 0.102  | 0.00 | 0.00 |
| ATOM | 41 | C33 | OCB | X | 1 | -1.892 | 2.880  | 5.233  | 0.00 | 0.00 |
| ATOM | 42 | C34 | OCB | X | 1 | -3.277 | 3.244  | 5.784  | 0.00 | 0.00 |
| ATOM | 43 | C35 | OCB | X | 1 | -3.320 | 3.681  | 7.259  | 0.00 | 0.00 |
| ATOM | 44 | O9  | OCB | X | 1 | -2.280 | 3.497  | 7.949  | 0.00 | 0.00 |
| ATOM | 45 | C36 | OCB | X | 1 | 2.963  | 0.933  | 5.580  | 0.00 | 0.00 |
| ATOM | 46 | C37 | OCB | X | 1 | 3.421  | 2.199  | 6.318  | 0.00 | 0.00 |
| ATOM | 47 | C38 | OCB | X | 1 | 4.943  | 2.357  | 6.418  | 0.00 | 0.00 |
| ATOM | 48 | O10 | OCB | X | 1 | 5.527  | 1.568  | 7.218  | 0.00 | 0.00 |
| ATOM | 49 | C39 | OCB | X | 1 | 0.947  | -3.926 | 4.802  | 0.00 | 0.00 |
| ATOM | 50 | C40 | OCB | X | 1 | 0.127  | -5.172 | 5.167  | 0.00 | 0.00 |
| ATOM | 51 | C41 | OCB | X | 1 | 0.921  | -6.479 | 5.126  | 0.00 | 0.00 |
| ATOM | 52 | O11 | OCB | X | 1 | 1.685  | -6.687 | 6.115  | 0.00 | 0.00 |
| ATOM | 53 | C42 | OCB | X | 1 | -3.882 | -2.063 | 4.565  | 0.00 | 0.00 |
| ATOM | 54 | C43 | OCB | X | 1 | -5.222 | -1.552 | 5.113  | 0.00 | 0.00 |
| ATOM | 55 | C44 | OCB | X | 1 | -5.610 | -2.138 | 6.479  | 0.00 | 0.00 |

|      |     |     |     |   |   |        |        |        |      |      |
|------|-----|-----|-----|---|---|--------|--------|--------|------|------|
| ATOM | 56  | O12 | OCB | X | 1 | -4.670 | -2.373 | 7.287  | 0.00 | 0.00 |
| ATOM | 57  | C45 | OCB | X | 1 | 4.693  | 2.039  | -0.235 | 0.00 | 0.00 |
| ATOM | 58  | C46 | OCB | X | 1 | 6.129  | 2.770  | -2.537 | 0.00 | 0.00 |
| ATOM | 59  | C47 | OCB | X | 1 | 4.545  | 3.324  | -0.799 | 0.00 | 0.00 |
| ATOM | 60  | C48 | OCB | X | 1 | 5.564  | 1.129  | -0.861 | 0.00 | 0.00 |
| ATOM | 61  | C49 | OCB | X | 1 | 6.270  | 1.487  | -2.010 | 0.00 | 0.00 |
| ATOM | 62  | C50 | OCB | X | 1 | 5.242  | 3.678  | -1.955 | 0.00 | 0.00 |
| ATOM | 63  | C51 | OCB | X | 1 | 2.049  | -3.987 | -1.343 | 0.00 | 0.00 |
| ATOM | 64  | C52 | OCB | X | 1 | 2.712  | -4.470 | -4.028 | 0.00 | 0.00 |
| ATOM | 65  | C53 | OCB | X | 1 | 1.145  | -4.644 | -2.204 | 0.00 | 0.00 |
| ATOM | 66  | C54 | OCB | X | 1 | 3.292  | -3.566 | -1.869 | 0.00 | 0.00 |
| ATOM | 67  | C55 | OCB | X | 1 | 3.627  | -3.809 | -3.202 | 0.00 | 0.00 |
| ATOM | 68  | C56 | OCB | X | 1 | 1.470  | -4.884 | -3.539 | 0.00 | 0.00 |
| ATOM | 69  | C57 | OCB | X | 1 | -4.312 | -1.729 | -1.663 | 0.00 | 0.00 |
| ATOM | 70  | C58 | OCB | X | 1 | -5.031 | -1.898 | -4.378 | 0.00 | 0.00 |
| ATOM | 71  | C59 | OCB | X | 1 | -5.100 | -0.726 | -2.263 | 0.00 | 0.00 |
| ATOM | 72  | C60 | OCB | X | 1 | -3.876 | -2.805 | -2.468 | 0.00 | 0.00 |
| ATOM | 73  | C61 | OCB | X | 1 | -4.235 | -2.896 | -3.814 | 0.00 | 0.00 |
| ATOM | 74  | C62 | OCB | X | 1 | -5.443 | -0.803 | -3.615 | 0.00 | 0.00 |
| ATOM | 75  | C63 | OCB | X | 1 | -1.741 | 4.125  | -0.944 | 0.00 | 0.00 |
| ATOM | 76  | C64 | OCB | X | 1 | -1.822 | 4.957  | -3.625 | 0.00 | 0.00 |
| ATOM | 77  | C65 | OCB | X | 1 | -2.943 | 4.057  | -1.690 | 0.00 | 0.00 |
| ATOM | 78  | C66 | OCB | X | 1 | -0.579 | 4.620  | -1.586 | 0.00 | 0.00 |
| ATOM | 79  | C67 | OCB | X | 1 | -0.621 | 5.036  | -2.919 | 0.00 | 0.00 |
| ATOM | 80  | C68 | OCB | X | 1 | -2.980 | 4.465  | -3.025 | 0.00 | 0.00 |
| ATOM | 81  | O13 | OCB | X | 1 | 4.801  | -3.441 | -3.826 | 0.00 | 0.00 |
| ATOM | 82  | O14 | OCB | X | 1 | -3.878 | -3.907 | -4.682 | 0.00 | 0.00 |
| ATOM | 83  | O15 | OCB | X | 1 | -6.213 | 0.127  | -4.283 | 0.00 | 0.00 |
| ATOM | 84  | O16 | OCB | X | 1 | 7.136  | 0.651  | -2.684 | 0.00 | 0.00 |
| ATOM | 85  | O17 | OCB | X | 1 | 5.145  | 4.900  | -2.580 | 0.00 | 0.00 |
| ATOM | 86  | O18 | OCB | X | 1 | -4.092 | 4.480  | -3.839 | 0.00 | 0.00 |
| ATOM | 87  | O19 | OCB | X | 1 | 0.440  | 5.464  | -3.685 | 0.00 | 0.00 |
| ATOM | 88  | C69 | OCB | X | 1 | -2.943 | -4.831 | -4.270 | 0.00 | 0.00 |
| ATOM | 89  | C70 | OCB | X | 1 | -1.141 | -6.841 | -3.591 | 0.00 | 0.00 |
| ATOM | 90  | C71 | OCB | X | 1 | -1.584 | -4.650 | -4.576 | 0.00 | 0.00 |
| ATOM | 91  | C72 | OCB | X | 1 | -3.402 | -6.021 | -3.692 | 0.00 | 0.00 |
| ATOM | 92  | C73 | OCB | X | 1 | -2.512 | -7.060 | -3.376 | 0.00 | 0.00 |
| ATOM | 93  | C74 | OCB | X | 1 | -0.683 | -5.646 | -4.165 | 0.00 | 0.00 |
| ATOM | 94  | O20 | OCB | X | 1 | 0.661  | -5.537 | -4.450 | 0.00 | 0.00 |
| ATOM | 95  | C75 | OCB | X | 1 | 6.928  | -0.712 | -2.589 | 0.00 | 0.00 |
| ATOM | 96  | C76 | OCB | X | 1 | 6.768  | -3.490 | -2.477 | 0.00 | 0.00 |
| ATOM | 97  | C77 | OCB | X | 1 | 7.930  | -1.450 | -1.946 | 0.00 | 0.00 |
| ATOM | 98  | C78 | OCB | X | 1 | 5.854  | -1.353 | -3.233 | 0.00 | 0.00 |
| ATOM | 99  | C79 | OCB | X | 1 | 5.765  | -2.752 | -3.121 | 0.00 | 0.00 |
| ATOM | 100 | C80 | OCB | X | 1 | 7.882  | -2.853 | -1.903 | 0.00 | 0.00 |
| ATOM | 101 | C81 | OCB | X | 1 | -6.167 | 1.437  | -3.853 | 0.00 | 0.00 |
| ATOM | 102 | C82 | OCB | X | 1 | -6.309 | 4.113  | -3.105 | 0.00 | 0.00 |
| ATOM | 103 | C83 | OCB | X | 1 | -7.365 | 1.969  | -3.356 | 0.00 | 0.00 |
| ATOM | 104 | C84 | OCB | X | 1 | -5.038 | 2.253  | -4.054 | 0.00 | 0.00 |
| ATOM | 105 | C85 | OCB | X | 1 | -5.110 | 3.583  | -3.605 | 0.00 | 0.00 |
| ATOM | 106 | C86 | OCB | X | 1 | -7.466 | 3.324  | -3.006 | 0.00 | 0.00 |
| ATOM | 107 | C87 | OCB | X | 1 | -8.799 | 3.932  | -2.614 | 0.00 | 0.00 |
| ATOM | 108 | O21 | OCB | X | 1 | -9.812 | 3.162  | -2.595 | 0.00 | 0.00 |
| ATOM | 109 | C88 | OCB | X | 1 | 3.092  | 9.309  | -2.201 | 0.00 | 0.00 |
| ATOM | 110 | O22 | OCB | X | 1 | 4.259  | 9.752  | -1.948 | 0.00 | 0.00 |
| ATOM | 111 | C89 | OCB | X | 1 | 9.040  | -3.653 | -1.335 | 0.00 | 0.00 |
| ATOM | 112 | O23 | OCB | X | 1 | 9.015  | -4.916 | -1.494 | 0.00 | 0.00 |
| ATOM | 113 | O24 | OCB | X | 1 | -4.406 | 4.235  | 7.616  | 0.00 | 0.00 |
| ATOM | 114 | O25 | OCB | X | 1 | -6.853 | -2.332 | 6.644  | 0.00 | 0.00 |
| ATOM | 115 | O26 | OCB | X | 1 | 0.679  | -7.242 | 4.149  | 0.00 | 0.00 |
| ATOM | 116 | C90 | OCB | X | 1 | -3.031 | -8.405 | -2.902 | 0.00 | 0.00 |
| ATOM | 117 | O27 | OCB | X | 1 | -2.180 | -9.347 | -2.775 | 0.00 | 0.00 |
| ATOM | 118 | O28 | OCB | X | 1 | 2.064  | 10.036 | -2.385 | 0.00 | 0.00 |

|      |     |     |     |   |   |        |        |        |      |      |
|------|-----|-----|-----|---|---|--------|--------|--------|------|------|
| ATOM | 119 | O29 | OCB | X | 1 | -8.833 | 5.189  | -2.407 | 0.00 | 0.00 |
| ATOM | 120 | O30 | OCB | X | 1 | -4.287 | -8.532 | -2.762 | 0.00 | 0.00 |
| ATOM | 121 | O31 | OCB | X | 1 | 10.005 | -3.002 | -0.816 | 0.00 | 0.00 |
| ATOM | 122 | O32 | OCB | X | 1 | 5.441  | 3.311  | 5.753  | 0.00 | 0.00 |
| ATOM | 123 | C91 | OCB | X | 1 | 3.941  | 5.579  | -2.586 | 0.00 | 0.00 |
| ATOM | 124 | C92 | OCB | X | 1 | 1.703  | 7.249  | -2.754 | 0.00 | 0.00 |
| ATOM | 125 | C93 | OCB | X | 1 | 2.730  | 5.047  | -3.067 | 0.00 | 0.00 |
| ATOM | 126 | C94 | OCB | X | 1 | 4.036  | 6.944  | -2.266 | 0.00 | 0.00 |
| ATOM | 127 | C95 | OCB | X | 1 | 2.933  | 7.809  | -2.379 | 0.00 | 0.00 |
| ATOM | 128 | C96 | OCB | X | 1 | 1.602  | 5.890  | -3.083 | 0.00 | 0.00 |
| ATOM | 129 | C97 | OCB | X | 1 | 2.616  | 3.636  | -3.578 | 0.00 | 0.00 |
| ATOM | 130 | C98 | OCB | X | 1 | 4.823  | -0.575 | -4.000 | 0.00 | 0.00 |
| ATOM | 131 | C99 | OCB | X | 1 | -1.115 | -3.424 | -5.303 | 0.00 | 0.00 |
| ATOM | 132 | C   | OCB | X | 1 | -3.811 | 1.729  | -4.742 | 0.00 | 0.00 |
| ATOM | 133 | H1  | OCB | X | 1 | 1.473  | -1.198 | 4.524  | 0.00 | 0.00 |
| ATOM | 134 | H2  | OCB | X | 1 | 4.406  | -1.722 | 0.563  | 0.00 | 0.00 |
| ATOM | 135 | H3  | OCB | X | 1 | 4.002  | 1.514  | 3.863  | 0.00 | 0.00 |
| ATOM | 136 | H4  | OCB | X | 1 | 2.920  | 1.199  | 0.549  | 0.00 | 0.00 |
| ATOM | 137 | H5  | OCB | X | 1 | 0.323  | 1.436  | 4.656  | 0.00 | 0.00 |
| ATOM | 138 | H6  | OCB | X | 1 | 1.722  | 4.213  | 0.804  | 0.00 | 0.00 |
| ATOM | 139 | H7  | OCB | X | 1 | -2.157 | 3.934  | 3.430  | 0.00 | 0.00 |
| ATOM | 140 | H8  | OCB | X | 1 | -1.239 | 2.537  | 0.349  | 0.00 | 0.00 |
| ATOM | 141 | H9  | OCB | X | 1 | 1.537  | -4.601 | 2.901  | 0.00 | 0.00 |
| ATOM | 142 | H10 | OCB | X | 1 | -4.414 | 1.683  | -0.021 | 0.00 | 0.00 |
| ATOM | 143 | H11 | OCB | X | 1 | -1.701 | -4.242 | -0.452 | 0.00 | 0.00 |
| ATOM | 144 | H12 | OCB | X | 1 | -2.852 | -1.141 | -0.259 | 0.00 | 0.00 |
| ATOM | 145 | H13 | OCB | X | 1 | -1.202 | -2.337 | 4.090  | 0.00 | 0.00 |
| ATOM | 146 | H14 | OCB | X | 1 | -2.405 | 0.300  | 4.295  | 0.00 | 0.00 |
| ATOM | 147 | H15 | OCB | X | 1 | -4.621 | -2.205 | 2.603  | 0.00 | 0.00 |
| ATOM | 148 | H16 | OCB | X | 1 | 1.240  | -2.620 | 0.038  | 0.00 | 0.00 |
| ATOM | 149 | H17 | OCB | X | 1 | -1.608 | 1.897  | 5.628  | 0.00 | 0.00 |
| ATOM | 150 | H18 | OCB | X | 1 | -1.158 | 3.589  | 5.639  | 0.00 | 0.00 |
| ATOM | 151 | H19 | OCB | X | 1 | -3.695 | 4.072  | 5.199  | 0.00 | 0.00 |
| ATOM | 152 | H20 | OCB | X | 1 | -3.955 | 2.390  | 5.668  | 0.00 | 0.00 |
| ATOM | 153 | H21 | OCB | X | 1 | 3.610  | 0.098  | 5.881  | 0.00 | 0.00 |
| ATOM | 154 | H22 | OCB | X | 1 | 1.955  | 0.673  | 5.919  | 0.00 | 0.00 |
| ATOM | 155 | H23 | OCB | X | 1 | 2.976  | 3.095  | 5.873  | 0.00 | 0.00 |
| ATOM | 156 | H24 | OCB | X | 1 | 3.049  | 2.150  | 7.350  | 0.00 | 0.00 |
| ATOM | 157 | H25 | OCB | X | 1 | 1.951  | -4.017 | 5.237  | 0.00 | 0.00 |
| ATOM | 158 | H26 | OCB | X | 1 | 0.484  | -3.064 | 5.295  | 0.00 | 0.00 |
| ATOM | 159 | H27 | OCB | X | 1 | -0.230 | -5.056 | 6.199  | 0.00 | 0.00 |
| ATOM | 160 | H28 | OCB | X | 1 | -0.774 | -5.259 | 4.549  | 0.00 | 0.00 |
| ATOM | 161 | H29 | OCB | X | 1 | -3.831 | -3.147 | 4.735  | 0.00 | 0.00 |
| ATOM | 162 | H30 | OCB | X | 1 | -3.065 | -1.630 | 5.153  | 0.00 | 0.00 |
| ATOM | 163 | H31 | OCB | X | 1 | -5.196 | -0.461 | 5.208  | 0.00 | 0.00 |
| ATOM | 164 | H32 | OCB | X | 1 | -6.024 | -1.798 | 4.406  | 0.00 | 0.00 |
| ATOM | 165 | H33 | OCB | X | 1 | 6.688  | 3.056  | -3.422 | 0.00 | 0.00 |
| ATOM | 166 | H34 | OCB | X | 1 | 3.885  | 4.049  | -0.327 | 0.00 | 0.00 |
| ATOM | 167 | H35 | OCB | X | 1 | 5.699  | 0.137  | -0.434 | 0.00 | 0.00 |
| ATOM | 168 | H36 | OCB | X | 1 | 2.971  | -4.665 | -5.064 | 0.00 | 0.00 |
| ATOM | 169 | H37 | OCB | X | 1 | 0.191  | -4.981 | -1.807 | 0.00 | 0.00 |
| ATOM | 170 | H38 | OCB | X | 1 | 3.997  | -3.061 | -1.217 | 0.00 | 0.00 |
| ATOM | 171 | H39 | OCB | X | 1 | -5.320 | -1.964 | -5.422 | 0.00 | 0.00 |
| ATOM | 172 | H40 | OCB | X | 1 | -5.451 | 0.110  | -1.665 | 0.00 | 0.00 |
| ATOM | 173 | H41 | OCB | X | 1 | -3.264 | -3.581 | -2.018 | 0.00 | 0.00 |
| ATOM | 174 | H42 | OCB | X | 1 | -1.853 | 5.275  | -4.664 | 0.00 | 0.00 |
| ATOM | 175 | H43 | OCB | X | 1 | -3.851 | 3.692  | -1.218 | 0.00 | 0.00 |
| ATOM | 176 | H44 | OCB | X | 1 | 0.358  | 4.658  | -1.039 | 0.00 | 0.00 |
| ATOM | 177 | H45 | OCB | X | 1 | -0.430 | -7.623 | -3.326 | 0.00 | 0.00 |
| ATOM | 178 | H46 | OCB | X | 1 | -4.467 | -6.162 | -3.513 | 0.00 | 0.00 |
| ATOM | 179 | H47 | OCB | X | 1 | 6.709  | -4.578 | -2.452 | 0.00 | 0.00 |
| ATOM | 180 | H48 | OCB | X | 1 | 8.776  | -0.935 | -1.494 | 0.00 | 0.00 |
| ATOM | 181 | H49 | OCB | X | 1 | -6.360 | 5.166  | -2.833 | 0.00 | 0.00 |

|      |     |     |     |   |   |        |        |        |      |      |
|------|-----|-----|-----|---|---|--------|--------|--------|------|------|
| ATOM | 182 | H50 | OCB | X | 1 | -8.244 | 1.332  | -3.271 | 0.00 | 0.00 |
| ATOM | 183 | H51 | OCB | X | 1 | 0.834  | 7.897  | -2.858 | 0.00 | 0.00 |
| ATOM | 184 | H52 | OCB | X | 1 | 4.999  | 7.359  | -1.969 | 0.00 | 0.00 |
| ATOM | 185 | H53 | OCB | X | 1 | 3.537  | 3.317  | -4.073 | 0.00 | 0.00 |
| ATOM | 186 | H54 | OCB | X | 1 | 2.381  | 2.952  | -2.758 | 0.00 | 0.00 |
| ATOM | 187 | H55 | OCB | X | 1 | 1.832  | 3.543  | -4.337 | 0.00 | 0.00 |
| ATOM | 188 | H56 | OCB | X | 1 | 4.010  | -0.268 | -3.335 | 0.00 | 0.00 |
| ATOM | 189 | H57 | OCB | X | 1 | 5.260  | 0.313  | -4.467 | 0.00 | 0.00 |
| ATOM | 190 | H58 | OCB | X | 1 | 4.401  | -1.166 | -4.820 | 0.00 | 0.00 |
| ATOM | 191 | H59 | OCB | X | 1 | -1.859 | -3.093 | -6.035 | 0.00 | 0.00 |
| ATOM | 192 | H60 | OCB | X | 1 | -0.923 | -2.612 | -4.596 | 0.00 | 0.00 |
| ATOM | 193 | H61 | OCB | X | 1 | -0.201 | -3.621 | -5.874 | 0.00 | 0.00 |
| ATOM | 194 | H62 | OCB | X | 1 | -3.124 | 1.286  | -4.015 | 0.00 | 0.00 |
| ATOM | 195 | H63 | OCB | X | 1 | -4.070 | 0.977  | -5.495 | 0.00 | 0.00 |
| ATOM | 196 | H64 | OCB | X | 1 | -3.289 | 2.521  | -5.289 | 0.00 | 0.00 |

END

### CBClip

|      |    |     |     |   |   |        |        |        |      |      |
|------|----|-----|-----|---|---|--------|--------|--------|------|------|
| ATOM | 1  | C1  | CLP | X | 1 | 3.196  | -0.441 | 3.284  | 0.00 | 0.00 |
| ATOM | 2  | C2  | CLP | X | 1 | 1.800  | -0.805 | 3.965  | 0.00 | 0.00 |
| ATOM | 3  | N1  | CLP | X | 1 | 3.400  | -1.513 | 2.343  | 0.00 | 0.00 |
| ATOM | 4  | N2  | CLP | X | 1 | 1.314  | -1.888 | 3.115  | 0.00 | 0.00 |
| ATOM | 5  | N3  | CLP | X | 1 | 2.923  | 0.805  | 2.600  | 0.00 | 0.00 |
| ATOM | 6  | N4  | CLP | X | 1 | 1.037  | 0.422  | 3.786  | 0.00 | 0.00 |
| ATOM | 7  | C3  | CLP | X | 1 | 2.271  | -2.295 | 2.196  | 0.00 | 0.00 |
| ATOM | 8  | C4  | CLP | X | 1 | 1.688  | 1.318  | 2.948  | 0.00 | 0.00 |
| ATOM | 9  | O1  | CLP | X | 1 | 2.149  | -3.208 | 1.391  | 0.00 | 0.00 |
| ATOM | 10 | O2  | CLP | X | 1 | 1.241  | 2.391  | 2.567  | 0.00 | 0.00 |
| ATOM | 11 | C5  | CLP | X | 1 | 0.135  | -2.673 | 3.360  | 0.00 | 0.00 |
| ATOM | 12 | C6  | CLP | X | 1 | 4.447  | -1.485 | 1.354  | 0.00 | 0.00 |
| ATOM | 13 | C7  | CLP | X | 1 | 3.857  | 1.433  | 1.674  | 0.00 | 0.00 |
| ATOM | 14 | C8  | CLP | X | 1 | 3.905  | 0.775  | 0.307  | 0.00 | 0.00 |
| ATOM | 15 | C9  | CLP | X | 1 | 3.792  | 1.555  | -0.865 | 0.00 | 0.00 |
| ATOM | 16 | C10 | CLP | X | 1 | 4.053  | -1.189 | -1.130 | 0.00 | 0.00 |
| ATOM | 17 | C11 | CLP | X | 1 | 3.703  | 0.981  | -2.159 | 0.00 | 0.00 |
| ATOM | 18 | C12 | CLP | X | 1 | 4.108  | -0.616 | 0.161  | 0.00 | 0.00 |
| ATOM | 19 | C13 | CLP | X | 1 | 3.812  | -0.420 | -2.292 | 0.00 | 0.00 |
| ATOM | 20 | C14 | CLP | X | 1 | 3.505  | 1.755  | -3.323 | 0.00 | 0.00 |
| ATOM | 21 | C15 | CLP | X | 1 | 3.426  | 1.174  | -4.589 | 0.00 | 0.00 |
| ATOM | 22 | C16 | CLP | X | 1 | 3.509  | -0.203 | -4.718 | 0.00 | 0.00 |
| ATOM | 23 | C17 | CLP | X | 1 | 3.685  | -0.990 | -3.582 | 0.00 | 0.00 |
| ATOM | 24 | O3  | CLP | X | 1 | 3.769  | 2.935  | -0.766 | 0.00 | 0.00 |
| ATOM | 25 | O4  | CLP | X | 1 | 4.133  | -2.561 | -1.226 | 0.00 | 0.00 |
| ATOM | 26 | C18 | CLP | X | 1 | 5.105  | 3.455  | -0.676 | 0.00 | 0.00 |
| ATOM | 27 | C19 | CLP | X | 1 | 5.281  | 4.666  | -1.588 | 0.00 | 0.00 |
| ATOM | 28 | C20 | CLP | X | 1 | 4.479  | 5.897  | -1.176 | 0.00 | 0.00 |
| ATOM | 29 | C21 | CLP | X | 1 | 5.434  | -3.008 | -1.607 | 0.00 | 0.00 |
| ATOM | 30 | C22 | CLP | X | 1 | 5.595  | -4.472 | -1.200 | 0.00 | 0.00 |
| ATOM | 31 | C23 | CLP | X | 1 | 6.850  | -4.775 | -0.384 | 0.00 | 0.00 |
| ATOM | 32 | S1  | CLP | X | 1 | 5.469  | 7.371  | -0.965 | 0.00 | 0.00 |
| ATOM | 33 | O5  | CLP | X | 1 | 6.575  | 7.124  | -0.072 | 0.00 | 0.00 |
| ATOM | 34 | O6  | CLP | X | 1 | 5.644  | 8.063  | -2.229 | 0.00 | 0.00 |
| ATOM | 35 | S2  | CLP | X | 1 | 8.392  | -4.957 | -1.290 | 0.00 | 0.00 |
| ATOM | 36 | O7  | CLP | X | 1 | 8.942  | -3.667 | -1.664 | 0.00 | 0.00 |
| ATOM | 37 | O8  | CLP | X | 1 | 9.224  | -5.926 | -0.617 | 0.00 | 0.00 |
| ATOM | 38 | O9  | CLP | X | 1 | 4.405  | 8.230  | -0.112 | 0.00 | 0.00 |
| ATOM | 39 | O10 | CLP | X | 1 | 7.841  | -5.638 | -2.642 | 0.00 | 0.00 |
| ATOM | 40 | C24 | CLP | X | 1 | -3.249 | -1.045 | 2.896  | 0.00 | 0.00 |
| ATOM | 41 | C25 | CLP | X | 1 | -1.898 | -1.147 | 3.742  | 0.00 | 0.00 |
| ATOM | 42 | N5  | CLP | X | 1 | -3.219 | 0.300  | 2.369  | 0.00 | 0.00 |



|      |     |     |     |   |   |        |        |        |      |      |
|------|-----|-----|-----|---|---|--------|--------|--------|------|------|
| ATOM | 43  | N6  | CLP | X | 1 | -1.389 | 0.218  | 3.690  | 0.00 | 0.00 |
| ATOM | 44  | N7  | CLP | X | 1 | -3.053 | -1.992 | 1.828  | 0.00 | 0.00 |
| ATOM | 45  | N8  | CLP | X | 1 | -1.091 | -2.053 | 2.933  | 0.00 | 0.00 |
| ATOM | 46  | C26 | CLP | X | 1 | -2.157 | 1.032  | 2.867  | 0.00 | 0.00 |
| ATOM | 47  | C27 | CLP | X | 1 | -1.758 | -2.468 | 1.789  | 0.00 | 0.00 |
| ATOM | 48  | O11 | CLP | X | 1 | -1.920 | 2.204  | 2.613  | 0.00 | 0.00 |
| ATOM | 49  | O12 | CLP | X | 1 | -1.285 | -3.145 | 0.884  | 0.00 | 0.00 |
| ATOM | 50  | C28 | CLP | X | 1 | -0.236 | 0.707  | 4.407  | 0.00 | 0.00 |
| ATOM | 51  | C29 | CLP | X | 1 | -4.184 | 0.793  | 1.406  | 0.00 | 0.00 |
| ATOM | 52  | C30 | CLP | X | 1 | -3.997 | -2.167 | 0.750  | 0.00 | 0.00 |
| ATOM | 53  | C31 | CLP | X | 1 | -3.923 | -1.102 | -0.322 | 0.00 | 0.00 |
| ATOM | 54  | C32 | CLP | X | 1 | -3.853 | -1.499 | -1.682 | 0.00 | 0.00 |
| ATOM | 55  | C33 | CLP | X | 1 | -4.028 | 1.199  | -1.091 | 0.00 | 0.00 |
| ATOM | 56  | C34 | CLP | X | 1 | -3.808 | -0.570 | -2.749 | 0.00 | 0.00 |
| ATOM | 57  | C35 | CLP | X | 1 | -4.007 | 0.278  | -0.016 | 0.00 | 0.00 |
| ATOM | 58  | C36 | CLP | X | 1 | -3.897 | 0.805  | -2.449 | 0.00 | 0.00 |
| ATOM | 59  | C37 | CLP | X | 1 | -3.657 | -0.032 | -5.139 | 0.00 | 0.00 |
| ATOM | 60  | C38 | CLP | X | 1 | -3.743 | 1.319  | -4.845 | 0.00 | 0.00 |
| ATOM | 61  | C39 | CLP | X | 1 | -3.847 | 1.731  | -3.516 | 0.00 | 0.00 |
| ATOM | 62  | O13 | CLP | X | 1 | -3.750 | -2.845 | -1.982 | 0.00 | 0.00 |
| ATOM | 63  | O14 | CLP | X | 1 | -4.090 | 2.545  | -0.796 | 0.00 | 0.00 |
| ATOM | 64  | C40 | CLP | X | 1 | -5.045 | -3.420 | -2.198 | 0.00 | 0.00 |
| ATOM | 65  | C41 | CLP | X | 1 | -4.907 | -4.935 | -2.364 | 0.00 | 0.00 |
| ATOM | 66  | C42 | CLP | X | 1 | -5.396 | -5.723 | -1.152 | 0.00 | 0.00 |
| ATOM | 67  | C43 | CLP | X | 1 | -5.437 | 3.042  | -0.880 | 0.00 | 0.00 |
| ATOM | 68  | C44 | CLP | X | 1 | -5.369 | 4.524  | -0.540 | 0.00 | 0.00 |
| ATOM | 69  | C45 | CLP | X | 1 | -6.710 | 5.219  | -0.711 | 0.00 | 0.00 |
| ATOM | 70  | S3  | CLP | X | 1 | -7.033 | -6.430 | -1.325 | 0.00 | 0.00 |
| ATOM | 71  | O15 | CLP | X | 1 | -7.290 | -7.311 | -0.212 | 0.00 | 0.00 |
| ATOM | 72  | O16 | CLP | X | 1 | -8.003 | -5.427 | -1.720 | 0.00 | 0.00 |
| ATOM | 73  | S4  | CLP | X | 1 | -6.611 | 6.954  | -0.282 | 0.00 | 0.00 |
| ATOM | 74  | O17 | CLP | X | 1 | -5.395 | 7.518  | -0.821 | 0.00 | 0.00 |
| ATOM | 75  | O18 | CLP | X | 1 | -7.906 | 7.565  | -0.462 | 0.00 | 0.00 |
| ATOM | 76  | O19 | CLP | X | 1 | -6.759 | -7.383 | -2.595 | 0.00 | 0.00 |
| ATOM | 77  | O20 | CLP | X | 1 | -6.422 | 6.785  | 1.311  | 0.00 | 0.00 |
| ATOM | 78  | C46 | CLP | X | 1 | -3.678 | -0.963 | -4.103 | 0.00 | 0.00 |
| ATOM | 79  | C47 | CLP | X | 1 | -4.531 | -1.313 | 3.697  | 0.00 | 0.00 |
| ATOM | 80  | C48 | CLP | X | 1 | -2.113 | -1.649 | 5.176  | 0.00 | 0.00 |
| ATOM | 81  | C49 | CLP | X | 1 | 1.938  | -1.236 | 5.432  | 0.00 | 0.00 |
| ATOM | 82  | C50 | CLP | X | 1 | 4.369  | -0.289 | 4.262  | 0.00 | 0.00 |
| ATOM | 83  | H1  | CLP | X | 1 | 0.072  | -2.903 | 4.403  | 0.00 | 0.00 |
| ATOM | 84  | H2  | CLP | X | 1 | 0.241  | -3.559 | 2.769  | 0.00 | 0.00 |
| ATOM | 85  | H3  | CLP | X | 1 | 4.659  | -2.481 | 1.025  | 0.00 | 0.00 |
| ATOM | 86  | H4  | CLP | X | 1 | 5.309  | -1.054 | 1.820  | 0.00 | 0.00 |
| ATOM | 87  | H5  | CLP | X | 1 | 4.836  | 1.437  | 2.103  | 0.00 | 0.00 |
| ATOM | 88  | H6  | CLP | X | 1 | 3.501  | 2.430  | 1.517  | 0.00 | 0.00 |
| ATOM | 89  | H7  | CLP | X | 1 | 3.414  | 2.779  | -3.235 | 0.00 | 0.00 |
| ATOM | 90  | H8  | CLP | X | 1 | 3.307  | 1.766  | -5.425 | 0.00 | 0.00 |
| ATOM | 91  | H9  | CLP | X | 1 | 3.441  | -0.643 | -5.649 | 0.00 | 0.00 |
| ATOM | 92  | H10 | CLP | X | 1 | 3.723  | -2.016 | -3.683 | 0.00 | 0.00 |
| ATOM | 93  | H11 | CLP | X | 1 | 5.812  | 2.695  | -0.936 | 0.00 | 0.00 |
| ATOM | 94  | H12 | CLP | X | 1 | 5.277  | 3.765  | 0.334  | 0.00 | 0.00 |
| ATOM | 95  | H13 | CLP | X | 1 | 5.024  | 4.395  | -2.591 | 0.00 | 0.00 |
| ATOM | 96  | H14 | CLP | X | 1 | 6.310  | 4.947  | -1.506 | 0.00 | 0.00 |
| ATOM | 97  | H15 | CLP | X | 1 | 3.949  | 5.690  | -0.269 | 0.00 | 0.00 |
| ATOM | 98  | H16 | CLP | X | 1 | 3.803  | 6.100  | -1.980 | 0.00 | 0.00 |
| ATOM | 99  | H17 | CLP | X | 1 | 6.186  | -2.408 | -1.139 | 0.00 | 0.00 |
| ATOM | 100 | H18 | CLP | X | 1 | 5.548  | -2.917 | -2.667 | 0.00 | 0.00 |
| ATOM | 101 | H19 | CLP | X | 1 | 5.585  | -5.086 | -2.076 | 0.00 | 0.00 |
| ATOM | 102 | H20 | CLP | X | 1 | 4.768  | -4.689 | -0.556 | 0.00 | 0.00 |
| ATOM | 103 | H21 | CLP | X | 1 | 6.683  | -5.659 | 0.196  | 0.00 | 0.00 |
| ATOM | 104 | H22 | CLP | X | 1 | 6.996  | -3.900 | 0.214  | 0.00 | 0.00 |
| ATOM | 105 | H23 | CLP | X | 1 | -0.331 | 1.764  | 4.550  | 0.00 | 0.00 |

|      |     |     |     |   |   |        |        |        |      |      |
|------|-----|-----|-----|---|---|--------|--------|--------|------|------|
| ATOM | 106 | H24 | CLP | X | 1 | -0.229 | 0.178  | 5.337  | 0.00 | 0.00 |
| ATOM | 107 | H25 | CLP | X | 1 | -4.159 | 1.863  | 1.399  | 0.00 | 0.00 |
| ATOM | 108 | H26 | CLP | X | 1 | -5.130 | 0.416  | 1.731  | 0.00 | 0.00 |
| ATOM | 109 | H27 | CLP | X | 1 | -4.989 | -2.202 | 1.148  | 0.00 | 0.00 |
| ATOM | 110 | H28 | CLP | X | 1 | -3.736 | -3.088 | 0.272  | 0.00 | 0.00 |
| ATOM | 111 | H29 | CLP | X | 1 | -3.579 | -0.347 | -6.118 | 0.00 | 0.00 |
| ATOM | 112 | H30 | CLP | X | 1 | -3.729 | 2.017  | -5.606 | 0.00 | 0.00 |
| ATOM | 113 | H31 | CLP | X | 1 | -3.890 | 2.740  | -3.306 | 0.00 | 0.00 |
| ATOM | 114 | H32 | CLP | X | 1 | -5.501 | -2.992 | -3.067 | 0.00 | 0.00 |
| ATOM | 115 | H33 | CLP | X | 1 | -5.669 | -3.213 | -1.354 | 0.00 | 0.00 |
| ATOM | 116 | H34 | CLP | X | 1 | -3.885 | -5.181 | -2.564 | 0.00 | 0.00 |
| ATOM | 117 | H35 | CLP | X | 1 | -5.532 | -5.214 | -3.186 | 0.00 | 0.00 |
| ATOM | 118 | H36 | CLP | X | 1 | -5.372 | -5.094 | -0.286 | 0.00 | 0.00 |
| ATOM | 119 | H37 | CLP | X | 1 | -4.729 | -6.554 | -1.055 | 0.00 | 0.00 |
| ATOM | 120 | H38 | CLP | X | 1 | -6.077 | 2.524  | -0.196 | 0.00 | 0.00 |
| ATOM | 121 | H39 | CLP | X | 1 | -5.844 | 2.889  | -1.858 | 0.00 | 0.00 |
| ATOM | 122 | H40 | CLP | X | 1 | -4.633 | 5.002  | -1.154 | 0.00 | 0.00 |
| ATOM | 123 | H41 | CLP | X | 1 | -5.097 | 4.604  | 0.491  | 0.00 | 0.00 |
| ATOM | 124 | H42 | CLP | X | 1 | -7.450 | 4.736  | -0.106 | 0.00 | 0.00 |
| ATOM | 125 | H43 | CLP | X | 1 | -6.988 | 5.149  | -1.742 | 0.00 | 0.00 |
| ATOM | 126 | H44 | CLP | X | 1 | -3.596 | -1.967 | -4.328 | 0.00 | 0.00 |
| ATOM | 127 | H45 | CLP | X | 1 | -4.626 | -0.584 | 4.473  | 0.00 | 0.00 |
| ATOM | 128 | H46 | CLP | X | 1 | -4.508 | -2.298 | 4.115  | 0.00 | 0.00 |
| ATOM | 129 | H47 | CLP | X | 1 | -5.375 | -1.242 | 3.043  | 0.00 | 0.00 |
| ATOM | 130 | H48 | CLP | X | 1 | -2.710 | -0.944 | 5.716  | 0.00 | 0.00 |
| ATOM | 131 | H49 | CLP | X | 1 | -1.172 | -1.789 | 5.665  | 0.00 | 0.00 |
| ATOM | 132 | H50 | CLP | X | 1 | -2.622 | -2.591 | 5.146  | 0.00 | 0.00 |
| ATOM | 133 | H51 | CLP | X | 1 | 2.507  | -2.140 | 5.487  | 0.00 | 0.00 |
| ATOM | 134 | H52 | CLP | X | 1 | 0.971  | -1.380 | 5.868  | 0.00 | 0.00 |
| ATOM | 135 | H53 | CLP | X | 1 | 2.443  | -0.467 | 5.978  | 0.00 | 0.00 |
| ATOM | 136 | H54 | CLP | X | 1 | 4.549  | -1.222 | 4.753  | 0.00 | 0.00 |
| ATOM | 137 | H55 | CLP | X | 1 | 4.154  | 0.472  | 4.983  | 0.00 | 0.00 |
| ATOM | 138 | H56 | CLP | X | 1 | 5.246  | -0.003 | 3.719  | 0.00 | 0.00 |
| END  |     |     |     |   |   |        |        |        |      |      |

## SAMPL5 instruction file

### SAMPL5 Host-Guest Systems, Measurements and Starting Files

Updated October 6, 2015

This challenge is based on three different hosts, which we are calling OctaAcidH (OAH), OctaAcidMe (OAMe) and CBClip, in aqueous solution. The measurements for these systems were generously carried out specifically for SAMPL5 by Professors Bruce Gibb (Tulane University; OctaAcids) and Lyle Isaacs (U. Maryland; CBClip). Data will be provided for one set of 6 guests with both OctaAcids, for a total of 12 measurements; and for a different set of 10 guests for CBClip.

The following subsections describe these systems, the experimental conditions and measurements, the quantities to be predicted, and how the molecule and simulation files provided in the download were set up.

#### OctaAcids

Two of the host molecules, OctaAcidH and OctaAcidMe, are closely related to each other, as the Me version simply has four methyl groups in place of four hydrogens. This change modifies the shape of the

binding cavity. Host OctaAcidMe is described here: doi:10.1021/ja200633d and host OctaAcidH is described here doi:10.1007/s10822-013-9690-2. There are also a number of papers from SAMPL4 which discuss calculations for this system, as summarized here: doi:10.1007/s10822-014-9735-1. OctaAcidH was used in the previous SAMPL4 challenge, but with a different set of guest molecules.

For the present SAMPL5 challenge, experimental binding data were obtained for the association of the following set of six guest molecules, OA-G1 to OA-G6, to both OctaAcidH and OctaAcidMe:

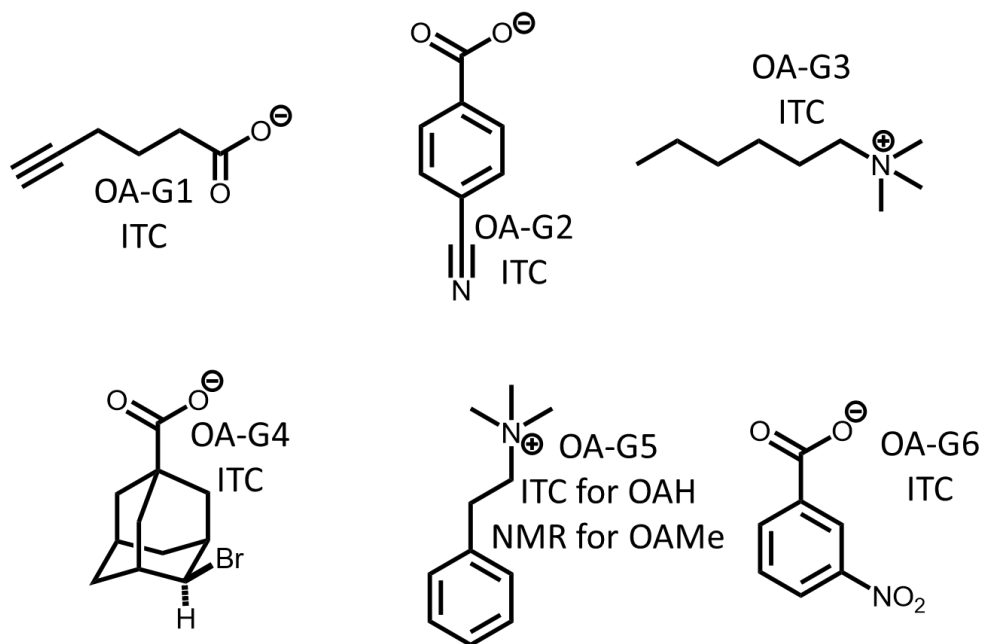

Binding affinities ( $K_a$ ) values will be available for all of these, measured by either isothermal titration calorimetry (ITC) or NMR, as indicated, and binding enthalpies also will be available for the studied by ITC, but not the ones studied by NMR, as noted in the graphic. The main challenge is to compute 12 binding free energies (or association constants), and participants are also invited to compute the binding enthalpies. All measurements were done in aqueous 10mM sodium phosphate buffer at pH 11.5, at 298K, except for OA-G6 (nitrobenzoic acid), for which the buffer was 50mM sodium phosphate at pH 11.5.

### CBClip

The CBClip host is a new “molecular clip” that is chemically related to the cucurbituril class of synthetic hosts. A paper describing this family of clips may be found here: doi:10.1039/c5ob00184f doi:10.1021/jm501276u, and the clip used in SAMPL5 is 2b ( $R = (\text{CH}_2)_3\text{SO}_3\text{Na}$ ) in this paper. The SAMPL5 challenge is to compute the binding free energies (association constants) of ten guest molecules to this host. The initial download on 9/15 had seven of the ten guests as a starting point, and the remaining three were identified by Dr. Isaacs during the first week of October, and are provided in this updated document. Here is the full set of ten:

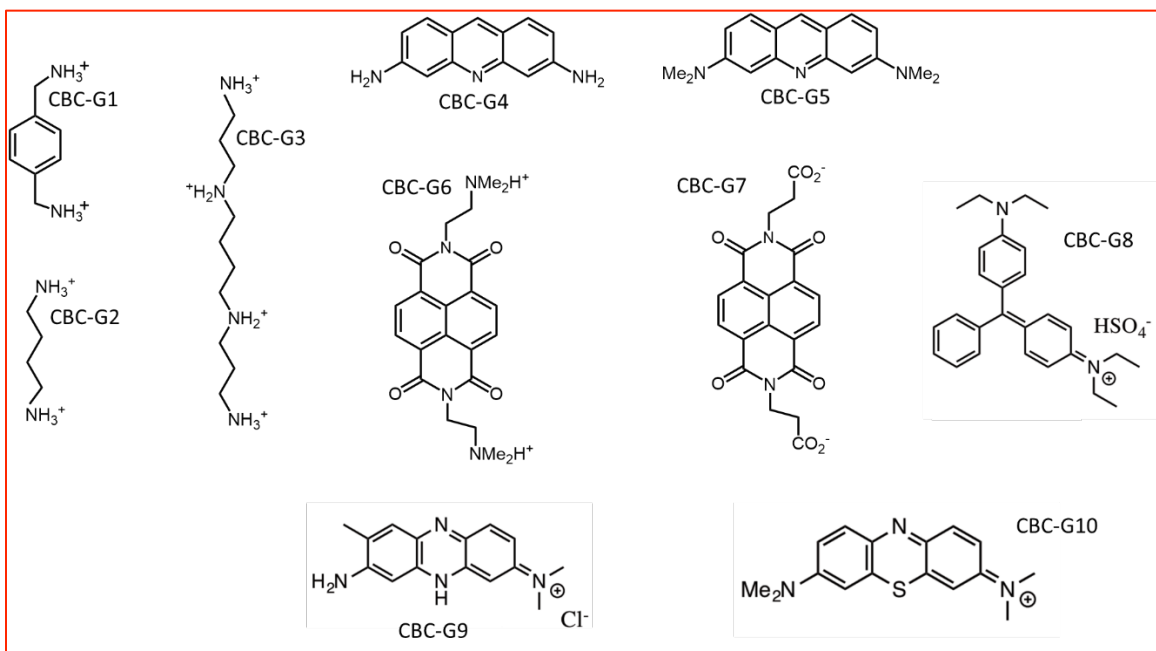

All CBClip measurements were done by NMR in 20 mM sodium phosphate buffer at pH 7.4, at a temperature of 298K.

### Molecule and simulation setups

An idealized model of the 3D structure of host CBClip was provided by Prof. Lyle Isaacs. The starting 3D structures of hosts OAH and OAMe were built manually with MOE and mildly energy minimized. The initial structures of free guest molecules were found via the conformational search feature in MOE. For CBClip, the experimental studies were done at pH 7.4, so the host's four sulfonic acid acids were treated as fully ionized, for a net host charge of -4. For the octa-acids, OAH and OAMe, the experimental studies were done at pH 11.5, so all eight carboxylic acids were treated as fully ionized, for a net charge of -8. The protonation states of all guest molecules were also assigned based on their expected pKas and the experimental pH values, as shown in the figures above, and were assumed to remain the same on binding their respective hosts. The resulting structures are provided in the download as PDB, mol2 and SDfiles. Please note that all of the structures provided here are meant only as reasonable starting points. There is no guarantee that they are optimal. Please take full advantage of your chemical knowledge and intuition in considering this and all other aspects of the challenge, and feel free to use computational tools beyond those used for the actual binding calculations.

As noted in the instructions, the organizers plan to carry out a complete set of binding free energy and enthalpy calculations with GAFF/RESP force field parameters and the TIP3P (non-modified) water model, and our starting files for the solvated bound complexes are being provided as part of the downloads for this challenge. The starting files were set up as follows. Partial charges were generated with the restrained electrostatic potential (RESP) fitting procedure, with electrostatic potentials at the HF/6-31G\* level. Bonded and van der Waals parameters were assigned by GAFF in Antechamber. For the octa-acids, which have a well-defined hydrophobic cavity, the bound conformations were set up with the guests'

ionized groups at the opening and their hydrophobic parts in the cavity. For the CBClip, the positions of the guests in the binding site were constructed by manual docking in MOE.

Each bound complex was placed in a cubic simulation box with edge length of about 40 Å, and containing 2100 TIP3P (non-modified) water molecules. Sodium ions were added to neutralize all systems. Given the low concentration of the buffer used in experiments, no extra ions were added to mimic the buffer. The sodium ions were modeled with the TIP3P-specific sodium parameters of Joung and Cheatham (*J Phys Chem B*. **2008**, *112*: 9020–9041). Each system was then subjected to a short equilibration phase (first NVT, then NPT) to heat the system and change the volume so the pressure would be about 1 atm. The solutes were restrained during the entire process, so further equilibration will be needed to relax them. Note that the AMBER.rst7 files contain velocities appropriate to 298.15 K.

The AMBER format files generated by these procedures were then converted to GROMACS, Desmond and LAMPPs formats with custom scripts and the energies of the starting conformations were compared. The results are summarized in the Instructions and detailed in the file SAMPL5Energies.xls.
